# Supplementary material for: Brief Resolved Unexplained Events (Formerly Apparent Life-Threatening Events) and Evaluation of Lower-Risk Infants
Source: Oxford University Press journal article supplement (doi:10.1542/peds.2016-0590), 2016-04-25
Supplement: peds20160590-sup-brue_joelteiderjune2016.pdf [file peds20160590-sup-brue_joelteiderjune2016.pdf]

# Brief Resolved Unexplained Events

(~~Apparent Life Threatening Events~~)

*Joel S. Tieder, MD, MPH*

*Chair, AAP Subcommittee on Brief Resolved Unexplained Events*

*Associate Professor Pediatrics*

*Seattle Children's Hospital*

*The University of Washington School of Medicine*

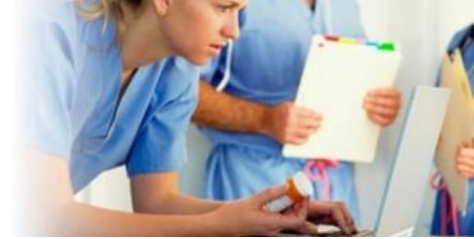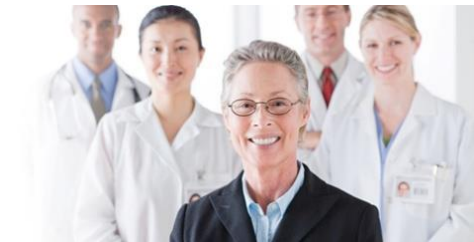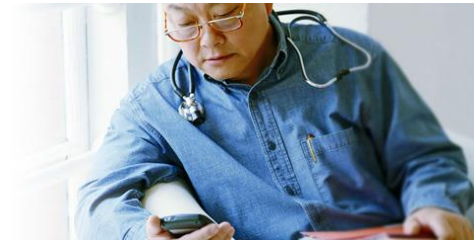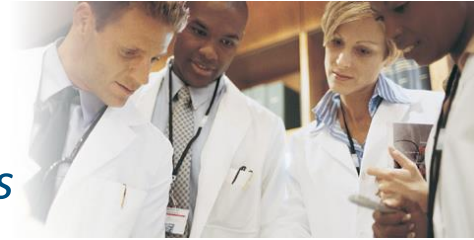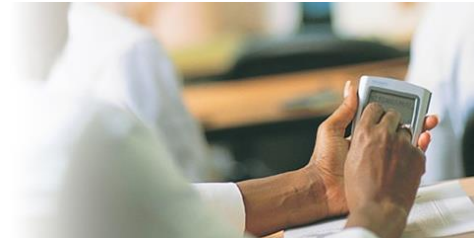

# Disclaimer

- Statements and opinions expressed are those of the authors and not necessarily those of the American Academy of Pediatrics.
- Mead Johnson sponsors programs such as this to give healthcare professionals access to scientific and educational information provided by experts. The presenter has complete and independent control over the planning and content of the presentation, and is not receiving any compensation from Mead Johnson for this presentation. The presenter's comments and opinions are not necessarily those of Mead Johnson. In the event that the presentation contains statements about uses of drugs that are not within the drugs' approved indications, Mead Johnson does not promote the use of any drug for indications outside the FDA-approved product label.

# You will learn about...

1. Historical framework and epidemiology
2. ALTE vs BRUE
3. Event characterization: explained vs unexplained
4. Risk stratification and new recommendations
5. Tools to implement change in your practice

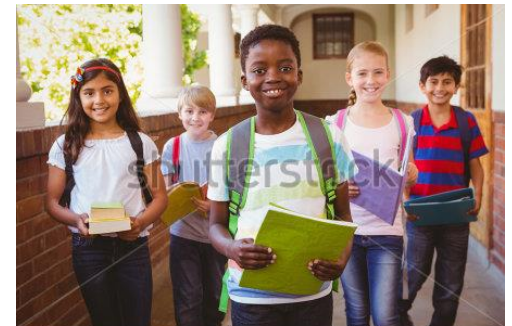

# Historical Framework and Epidemiology

1

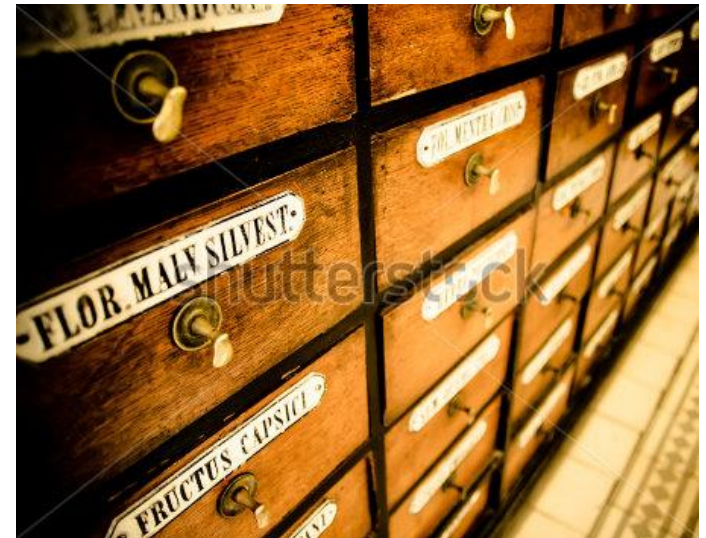

# What was an Apparent Life Threatening Event?

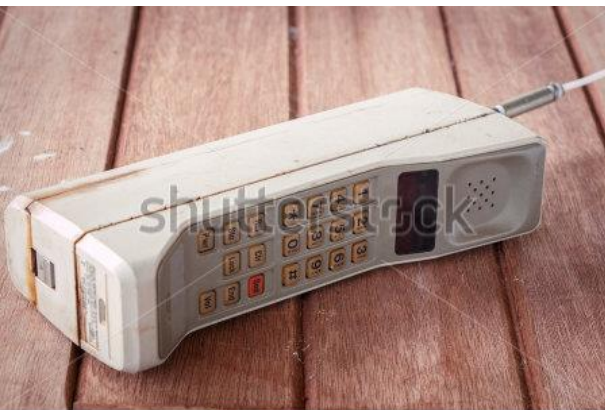

www.shutterstock.com · 253327996

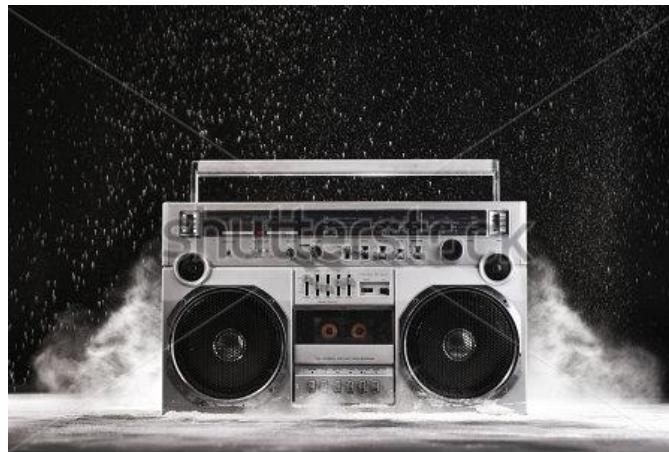

www.shutterstock.com · 339969992

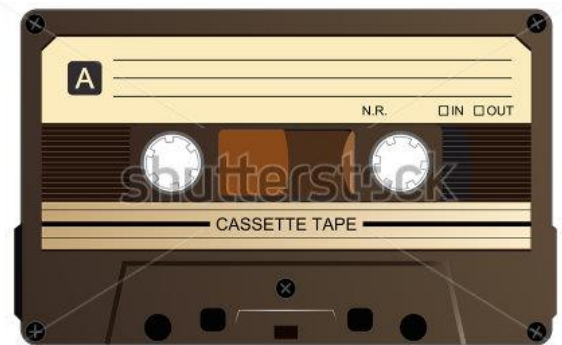

www.shutterstock.com · 234069628

# Definition of ALTE

An episode in the first year of life that appears potentially life threatening to the observer and is characterized by some combination of:

- Color change
- Apnea
- Alteration in muscle tone
- Choking or gagging

# Defined decades ago to better understand SIDS

National Institutes of Health  
Consensus Development Conference Statement  
September 29-October 1, 1986

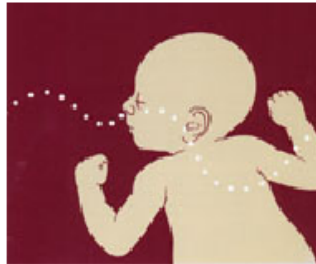

**This statement is more than five years old and is provided solely for historical purposes. Due to the cumulative nature of medical research, new knowledge has inevitably accumulated in this subject area in the time since the statement was initially prepared. Thus some of the material is likely to be out of date, and at worst simply wrong. For reliable, current information on this and other health topics, we recommend consulting the National Institutes of Health's MedlinePlus <http://www.nlm.nih.gov/medlineplus/>.**

This statement was originally published as: Infantile Apnea and Home Monitoring. NIH Consens Statement 1986 Sep 29-Oct 1;6(6):1-10.

# Epidemiology

## Conservatively

- 1 out of 250-400 children hospitalized for an ALTE

## But scary events are very common

- 43% of healthy infants have had 20 sec apnea episode over 3 mo period
- 5% of parents recall seeing apnea event
- Normal in infants: choking, gagging, blue discoloration, tone changes, periodic and irregular breathing

- Monti MC, Borrelli P, Nosetti L, Tajè S, Perotti M, Bonarrigo D, Stramba Badiale M, Montomoli C. Incidence of apparent life-threatening events and post-neonatal risk factors. *Acta Paediatr*. 2016 Mar 6.
- Kiechl-Kohlendorfer U, Hof D, Peglow UP, Traweger-Ravanelli B, Kiechl S. Epidemiology of apparent life threatening events. *Arch Dis Child*. 2005 Mar;90(3):297-300.
- Ramanathan R, Corwin MJ, Hunt CE, et al. Cardiorespiratory events recorded on home monitors: comparison of healthy infants with those at increased risk for SIDS. *JAMA* 2001;285: 2199– 207
- Mitchell EA, Thompson JM. Parental reported apnoea, admissions to hospital and sudden infant death syndrome. *Acta Paediatr* 2001;90:417– 22.]



# ALTE discharge diagnosis

## Most common

- Idiopathic (26-50%)
- GER (26-54%)
- Respiratory infection (8-11%)
- Seizure (9-11%)

## Less common

- Child maltreatment (<1%)
- Pertussis (0.05-9%)
- Cardiac arrhythmias (<1%)
- Bacterial infection (0-8%)
- Metabolic Disorder (1.5%)

# AN ALTE IS NOT A WARNING SIGN FOR SIDS!

- No causal relationship of preexisting apnea or ALTE and SIDs
- Interventions to reduce SIDs have not reduced ALTEs (e.g. back to sleep)
- SIDS and ALTEs have different risk factors

- Bonkowsky, J. L., Guenther, E., Filloux, F. M., & Srivastava, R. (2008). Death, child abuse, and adverse neurological outcome of infants after an apparent life-threatening event. *Pediatrics*, 122(1), 125-131. doi: 10.1542/peds.2007-3376
- Esani N, Hodgman JE, Ehsani N, Hoppenbrouwers T. Apparent life-threatening events and sudden infant death syndrome: comparison of risk factors. *J Pediatr*. 2008 Mar;152(3):365-70.
- Freed GE, Steinschneider A, Glassman M, Winn K. Sudden infant death syndrome prevention and an understanding of selected clinical issues. *Pediatr Clin North Am*. 1994 Oct;41(5):967-90. Review.

# ALTE...a recipe for a testing/treatment cascade

- Broad differential diagnosis
- Anxiety provoking
- Common
- Low prevalence of disease
- Perceived reassurance from testing or hospitalization
- Poor understanding of true risk
- Use of nonspecific testing prone to false positive results

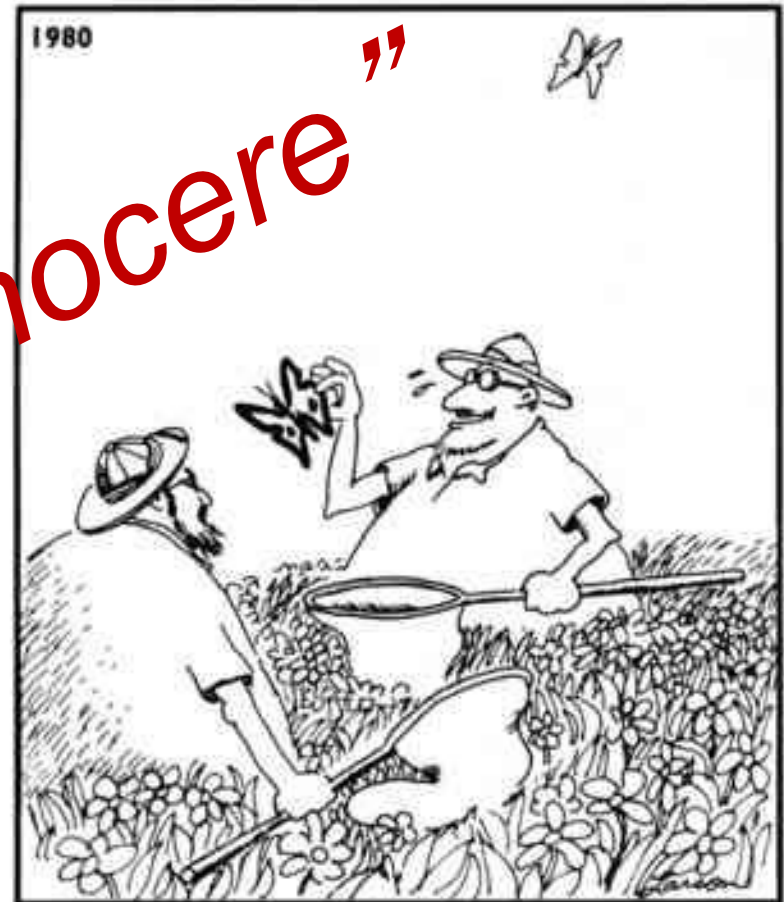

"An excellent specimen ... symbol of beauty, innocence, and fragile life ... hand me the jar of ether."

# High Resource Use and Variation

- Multicenter study of patients hospitalized with ALTE
- Mean LOS = 4.4 (SD 5.6) days
- Mean adjusted charges = \$15,567 (SD \$28,510)
- Readmission = 2.5% but variable

Tieder, JS et al. Variation in inpatient resource utilization and management of Apparent Life-Threatening Events. *J Peds.* 2008 May;152(5):629-35, 635.

## Variation in Inpatient Resource Utilization and Management of Apparent Life-Threatening Events

JOEL S. TIEDER, MD, MPH, CHARLES A. COWAN, MD, MICHELLE M. GARRISON, PHD, AND DENITRA A. CHRISTAKIS, MPH

**Objective** To report national variations in diagnostic approaches to apparent life-threatening events (ALTEs) and resource utilization.

**Study design** Using the Pediatric Health Information System, we studied children who were age 3 days to 5 months at admission and were discharged with an *International Classification of Diseases, Ninth Revision (ICD-9)* code potentially identifiable as ALTE. Multiple analysis of variance was used to determine whether the variances in adjusted charges, length of stay (LOS), and diagnostic studies were hospital-related after controlling for other covariates. Logistic regression was used to study the association of readmission rates with discharge diagnosis and specific diagnostic studies.

**Results** The study group comprised 12,067 patients, with a mean LOS of 4.4 days (standard deviation  $\pm$  5.6 days) and mean adjusted charges of \$15,567 (\$28,510) per admission. The mean in-hospital mortality rate was 0.56% (n = 68), and the rate of 30-day readmission was 2.5%. The most common discharge diagnoses were gastroesophageal reflux 36.9% (48.3%) and lower respiratory tract infection 30.8% (46.2%). Mean LOS, total adjusted charges, and use of diagnostic studies varied considerably across hospitals, and hospital-level differences were a significant contributor to the variance of these outcomes after controlling for covariates (P < .001). There was an increased likelihood of readmission for patients discharged with a diagnosis of cardiovascular disorders (odds ratio [OR] = 1.68; 95% confidence interval [CI] = 1.30 to 2.16) and gastroesophageal reflux (OR = 1.32; 95% CI = 1.03 to 1.69) compared with other discharge diagnoses.

**Conclusions** There is considerable hospital-based variation in care for patients hospitalized for conditions potentially identifiable as ALTE, particularly in the evaluation and diagnosis of gastroesophageal reflux, which may contribute to adverse clinical and financial outcomes. An evidence-based national standard of care for ALTE is needed, as are multi-institutional initiatives to study different diagnostic and management strategies and their effect on patient outcomes. (*J Pediatr* 2008;152:629-35)

**A**n apparent life-threatening event (ALTE) is defined as an episode in the first year of life that appears potentially life-threatening to the observer and is characterized by some combination of color change, apnea, alteration in muscle tone, and choking or gagging.<sup>1</sup> The true incidence of ALTEs is largely unknown, but they may account for 2.3% of hospitalized children and 0.6% to 0.8% of all emergency department visits for children under age 1 year.<sup>2,3</sup> The most frequently reported underlying causes are gastroesophageal reflux (GER), seizures, and lower respiratory tract infection (LRTI); less common causes include pertussis, cardiac arrhythmias, nonaccidental trauma, and bacterial infections. The underlying etiology can be elusive; >50% of ALTEs are considered idiopathic.<sup>3-7</sup>

Infants who present to the clinician because of an ALTE, particularly those who subsequently appear well, pose a diagnostic and management dilemma. ALTEs typically evoke significant anxiety in caretakers, but a treatable diagnosis is seldom found, morbidity and mortality is poorly understood, and the risk of recurrence is unknown. Consequently, many children with ALTE are hospitalized and often undergo an extensive and potentially unfruitful evaluation, presumably to rule out serious underlying conditions. Recent research based in tertiary care academic centers suggests that children presenting to the emergency department with an ALTE may receive excessive medical intervention. A

See editorial, p 604

From the Department of Pediatrics, University of Washington School of Medicine (J.T., C.C., M.G., D.C.), Children's Hospital and Regional Medical Center (J.T., C.C., D.C.), and Child Health Institute (M.G., D.C.), Seattle, WA.

Submitted for publication Mar 5, 2007; last revision received Jul 11, 2007; accepted Nov 12, 2007.

Reprint requests: Joel S. Tieder, MD, MPH, Children's Hospital and Regional Medical Center, 4800 Sand Point Way NE, Mail Stop T-1201, Seattle, WA 98105. E-mail: joel.tieder@seattlechildrens.org.  
0022-3476/\$ - see front matter  
Copyright © 2008 Mosby Inc. All rights reserved.  
10.1016/j.peds.2007.11.024

|       |                                                          |      |                                     |
|-------|----------------------------------------------------------|------|-------------------------------------|
| ALTE  | Apparent life-threatening event                          | LOS  | Length of stay                      |
| ANOVA | Analysis of variance                                     | LRTI | Lower respiratory tract infection   |
| CI    | Confidence interval                                      | OR   | Odds ratio                          |
| GER   | Gastroesophageal reflux                                  | PHIS | Pediatric Health Information System |
| GI    | Gastrointestinal                                         |      |                                     |
| ICD-9 | International Classification of Diseases, Ninth Revision |      |                                     |

# Resource Utilization Across Hospitals

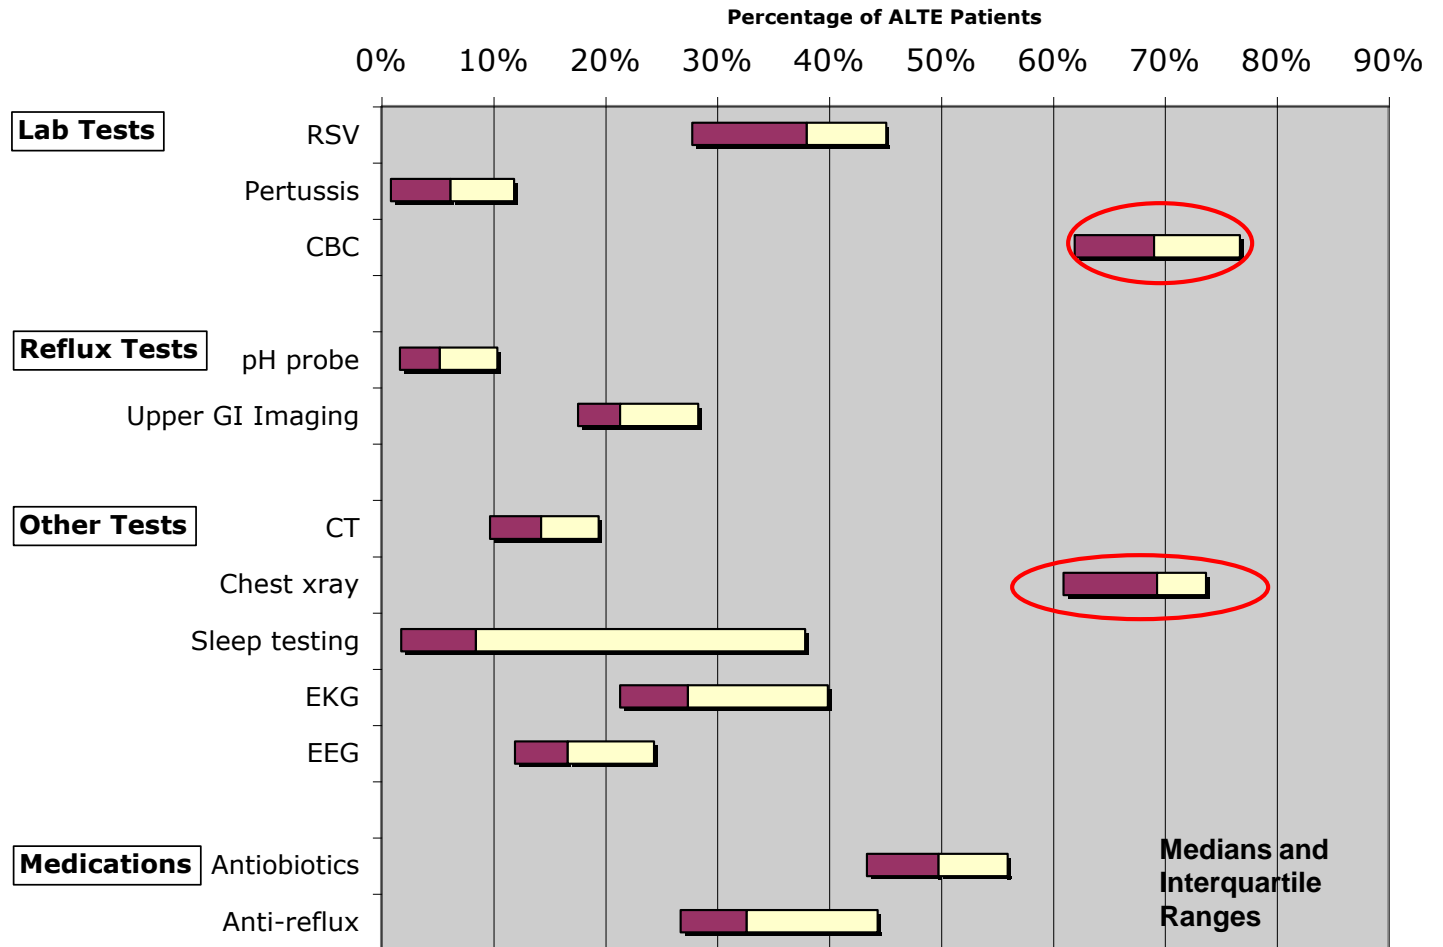

# Systematic Review

THE JOURNAL OF PEDIATRICS • www.jpeds.com

ORIGINAL  
ARTICLES

## Management of Apparent Life-Threatening Events in Infants: A Systematic Review

Joel S. Tieder, MD, MPH<sup>1</sup>, Robin L. Altman, MD<sup>2</sup>, Joshua L. Bonkowsky, MD, PhD<sup>2</sup>, Donald A. Brand, PhD<sup>4,5</sup>,  
Ilene Claudius, MD<sup>6</sup>, Diana J. Cunningham, MLS, MPH, AHIP<sup>7</sup>, Craig DeWolfe, MD, Med<sup>8</sup>, Jack M. Perceley, MD, MPH<sup>9</sup>,  
Raymond D. Pitetti, MD, MPH<sup>10</sup>, and Michael B. H. Smith, MB, FRCP, FRCPCH<sup>11</sup>

**Objective** To determine in patients who are well-appearing and without a clear etiology after an apparent life-threatening event (ALTE): (1) What historical and physical examination features suggest that a child is at risk for a future adverse event and/or serious underlying diagnosis and would, therefore, benefit from testing or hospitalization? and (2) What testing is indicated on presentation and during hospitalization?

**Study design** Systematic review of clinical studies, excluding case reports, published from 1970 through 2011 identified using key words for ALTE.

**Results** The final analysis was based on 37 studies; 18 prospective observational, 19 retrospective observational. None of the studies provided sufficient evidence to fully address the clinical questions. Risk factors identified from historical and physical examination features included a history of prematurity, multiple ALTEs, and suspected child maltreatment. Routine screening tests for gastroesophageal reflux, meningitis, bacteremia, and seizures are low yield in infants without historical risk factors or suggestive physical examination findings.

**Conclusion** Some historical and physical examination features can be used to identify risk in infants who are well-appearing and without a clear etiology at presentation, and testing tailored to these risks may be of value. The true risk of a subsequent event or underlying disorder cannot be ascertained. A more precise definition of an ALTE is needed and further research is warranted. (*J Pediatr* 2013; ■■■■■).

An apparent life-threatening event (ALTE) was defined at a consensus development conference convened in 1986 by the National Institutes of Health to address the relationship between sudden infant death syndrome (SIDS) and apnea.<sup>1</sup> An ALTE was defined as “an episode that is frightening to the observer and that is characterized by some combination of apnea (central or occasionally obstructive), color change (usually cyanotic or pallid but occasionally erythematous or plethoric), marked change in muscle tone (usually marked limpness), choking, or gagging.”

There are three significant challenges for clinicians managing patients who have experienced an ALTE. First, the infant is often asymptomatic at presentation. Second, although most ALTEs represent a benign event, they can signify a more serious illness, such as sepsis or child maltreatment. Third, the decision to perform tests or hospitalize a patient is fraught with uncertainties. Clinicians may hospitalize the infant to facilitate observation, educate the parents, or complete tests. Yet, this approach may subject the patient to unnecessary risk and increase parental anxiety without improving outcomes.<sup>2,3</sup>

Given a lack of consensus regarding the management of infants who are initially well-appearing and without a clear etiology, an ALTE expert panel systematically reviewed the literature to answer two key questions: (1) What historical and physical examination features on presentation suggest that an infant is at risk for a future adverse event and/or serious underlying diagnosis and would therefore benefit from diagnostic testing and hospitalization? and (2) What testing is indicated on presentation and during hospitalization?

ALTE Apparent life-threatening event  
ED Emergency department  
EEG Electroencephalogram  
GER Gastroesophageal reflux  
RR Relative risk  
SIDS Sudden infant death syndrome  
URI Upper respiratory tract

From the <sup>1</sup>Department of Pediatrics, Division of Hospital Medicine, Seattle Children's Hospital and the University of Washington, Seattle, WA; <sup>2</sup>Department of Pediatrics, Division of General Pediatrics, New York Medical College, Maria Faveri Children's Hospital at Westchester Medical Center, Valhalla, NY; <sup>3</sup>Department of Pediatrics, Division of Pediatric Neurology, University of Utah School of Medicine, Salt Lake City, UT; <sup>4</sup>Office of Health Outcomes Research, Winthrop University Hospital, Mineola, NY; <sup>5</sup>Department of Preventive Medicine, Stony Brook University School of Medicine, Stony Brook, NY; <sup>6</sup>Department of Emergency Medicine, Los Angeles County and University of Southern California (LAC+USC), University of Southern California Keck School of Medicine, Los Angeles, CA; <sup>7</sup>New York Medical College, Valhalla, NY; <sup>8</sup>Department of Pediatrics, Pediatric Hospitalist Division, Children's National Medical Center, George Washington University School of Medicine and Health Sciences, Washington, D.C.; <sup>9</sup>U.S. M.O. Pediatrics, New York, NY; <sup>10</sup>Sedation Services and Emergency Department, Children's Hospital of Pittsburgh of the University of Pittsburgh Medical Center, Pittsburgh, PA; and <sup>11</sup>Northern Ireland Clinical Research Network for Children, Department of Pediatrics, Craigavon Hospital, Craigavon, Northern Ireland.

The Society of Hospital Medicine sponsored the conference calls and an online data management platform for this study; however, it was not involved in the study design, writing of the report, decision to submit the manuscript for publication, or collection, analysis, and interpretation of data. The authors declare no conflicts of interest.

0022-3476/\$ - see front matter. Copyright © 2013 Mosby Inc. All rights reserved. http://dx.doi.org/10.1016/j.jpeds.2012.12.038

- For infants that are well appearing upon presentation...
- Historical and PE features can identify risk
  - Testing tailored to these risks of value
  - True risk of a subsequent event or underlying disorder cannot be ascertained
  - A more precise definition of an ALTE is needed
  - Further research is warranted

## Brief Resolved Unexplained Events (Formerly Apparent Life-Threatening Events) and Evaluation of Lower- Risk Infants: Executive Summary

Joel S. Tieder, MD, MPH, FAAP, Joshua L. Bonkowsky, MD, PhD, FAAP, Ruth A. Etzel, MD, PhD, FAAP, Wayne H. Franklin, MD, MPH, MMM, FAAP, David A. Grense, MD, FAAP, Bruce Horman, MD, FAAP, Eliot S. Kitz, MD, FAAP, Leonard R. Krilov, MD, FAAP, J. Lawrence Merritt II, MD, FAAP, Chuck Norlin, MD, FAAP, Jack Perceley, MD, MPH, FAAP, Robert E. Sapirito, MD, MMM, FAAP, Richard N. Shiffman, MD, MOIS, FAAP, Michael B.H. Smith, MB, FRCPCH, FAAP, SUBCOMMITTEE ON APPARENT LIFE-THREATENING EVENTS

### EXECUTIVE SUMMARY

This clinical practice guideline has 2 primary objectives. First, it recommends the replacement of the term “apparent life-threatening event” (ALTE) with a new term, “brief resolved unexplained event” (BRUE). Second, it provides an approach to evaluation and management that is based on the risk that the infant will have a repeat event or has a serious underlying disorder.

Clinicians should use the term BRUE to describe an event occurring in an infant younger than 1 year when the observer reports a sudden, brief, and now resolved episode of  $\geq 1$  of the following: (1) cyanosis or pallor; (2) absent, decreased, or irregular breathing; (3) marked change in tone (hyper- or hypotonia); and (4) altered level of responsiveness. Moreover, clinicians should diagnose a BRUE only when there is no explanation for a qualifying event after conducting an appropriate history and physical examination (see Tables 2 and 3 in [www.pediatrics.org/cgi/doi/10.1542/peds.2016-0590](http://www.pediatrics.org/cgi/doi/10.1542/peds.2016-0590)). Among infants who present for medical attention after a BRUE, the guideline identifies (1) lower-risk patients on the basis of history and physical examination, for whom evidence-based guidelines for evaluation and management are offered, and (2) higher-risk patients, whose history and physical examination suggest the need for further investigation, monitoring, and/or treatment, but for whom recommendations are not offered (because of insufficient evidence or the availability of guidance from other clinical practice guidelines specific to their presentation or diagnosis). Recommendations in this guideline apply only to lower-risk patients,

*This document is copyrighted and is property of the American Academy of Pediatrics and its Board of Directors. All authors have filed conflict of interest statements with the American Academy of Pediatrics. Any conflicts have been resolved through a process approved by the Board of Directors. The American Academy of Pediatrics has neither solicited nor accepted any commercial involvement in the development of this publication.*

*The guidance in this report does not indicate an exclusive course of treatment or serve as a standard of medical care. Variations, taking into account individual circumstances, may be appropriate.*

*All clinical practice guidelines from the American Academy of Pediatrics automatically expire 5 years after publication unless reaffirmed, revised, or retired at or before that time.*

DOI: 10.1542/peds.2016-0591

PEDIATRICS (ISSN Numbers: Print, 0031-4005; Online, 1096-4270).

Copyright © 2016 by the American Academy of Pediatrics

To cite: Tieder JS, Bonkowsky JL, Etzel RA, et al. Brief Resolved Unexplained Events (Formerly Apparent Life-Threatening Events) and Evaluation of Lower-Risk Infants: Executive Summary. *Pediatrics*. 2016;137(5):e20160591

# The Event Formerly Known as ALTE

# 2

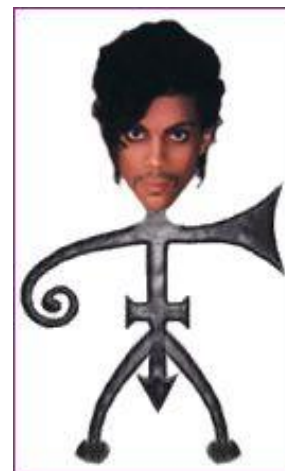

# ALTE vs BRUE

## ALTE

- An episode in the first year of life that appears potentially life threatening to the observer and is characterized by some combination of...

## BRUE

- Event occurring in an infant < 1 year where the observer reports a sudden, brief period of one or more of the following...
- No explanation for event after appropriate history and PE



# ALTE vs BRUE

## ALTE

- Color change
- Apnea
- Alteration in muscle tone
- Choking or gagging

## BRUE

- Cyanosis or pallor
- Absent, decreased, or irregular breathing
- Marked change in tone (hyper- or hypotonia)
- Altered level of responsiveness

# ALTE vs BRUE

## ALTE

- Both chief complaint and diagnosis
- Not always life-threatening
- Can have ongoing symptoms (e.g., fever, URI)
- Can have a diagnosis (e.g., meningitis, bronchiolitis)

## BRUE

- Diagnosis of exclusion
- Excludes patients with an explanation or diagnosis (e.g., GER)
- Excludes symptomatic infants (i.e., just an event)

# Event characterization

## Explained vs Unexplained

3

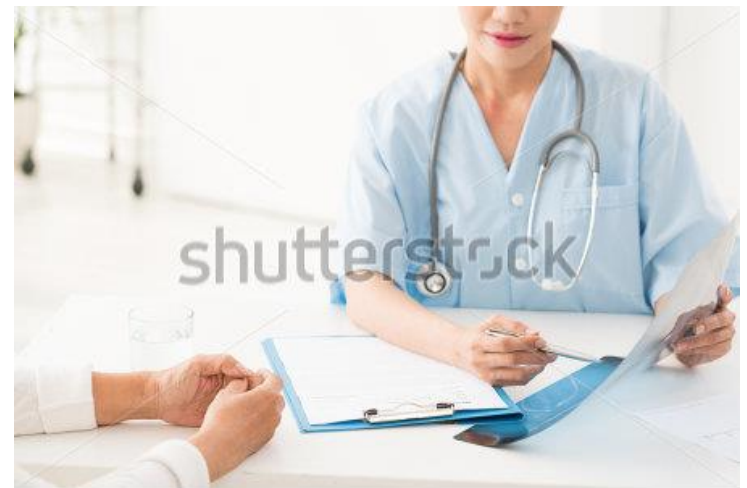

## BRUE Diagnosis

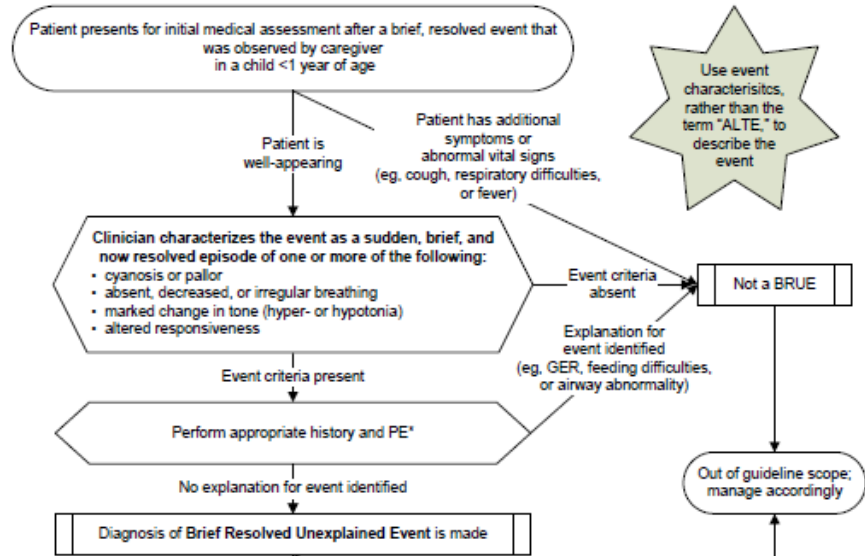

## BRUE Risk Classification

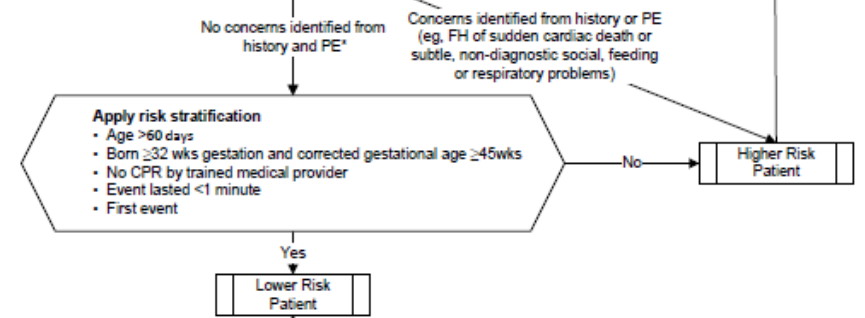

## Management Recommendations for Lower Risk Patients \*\*

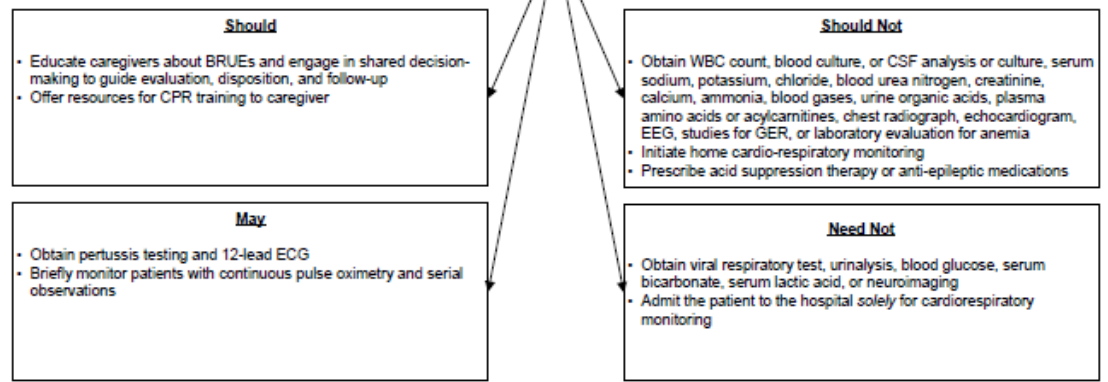

# BRUE Diagnosis

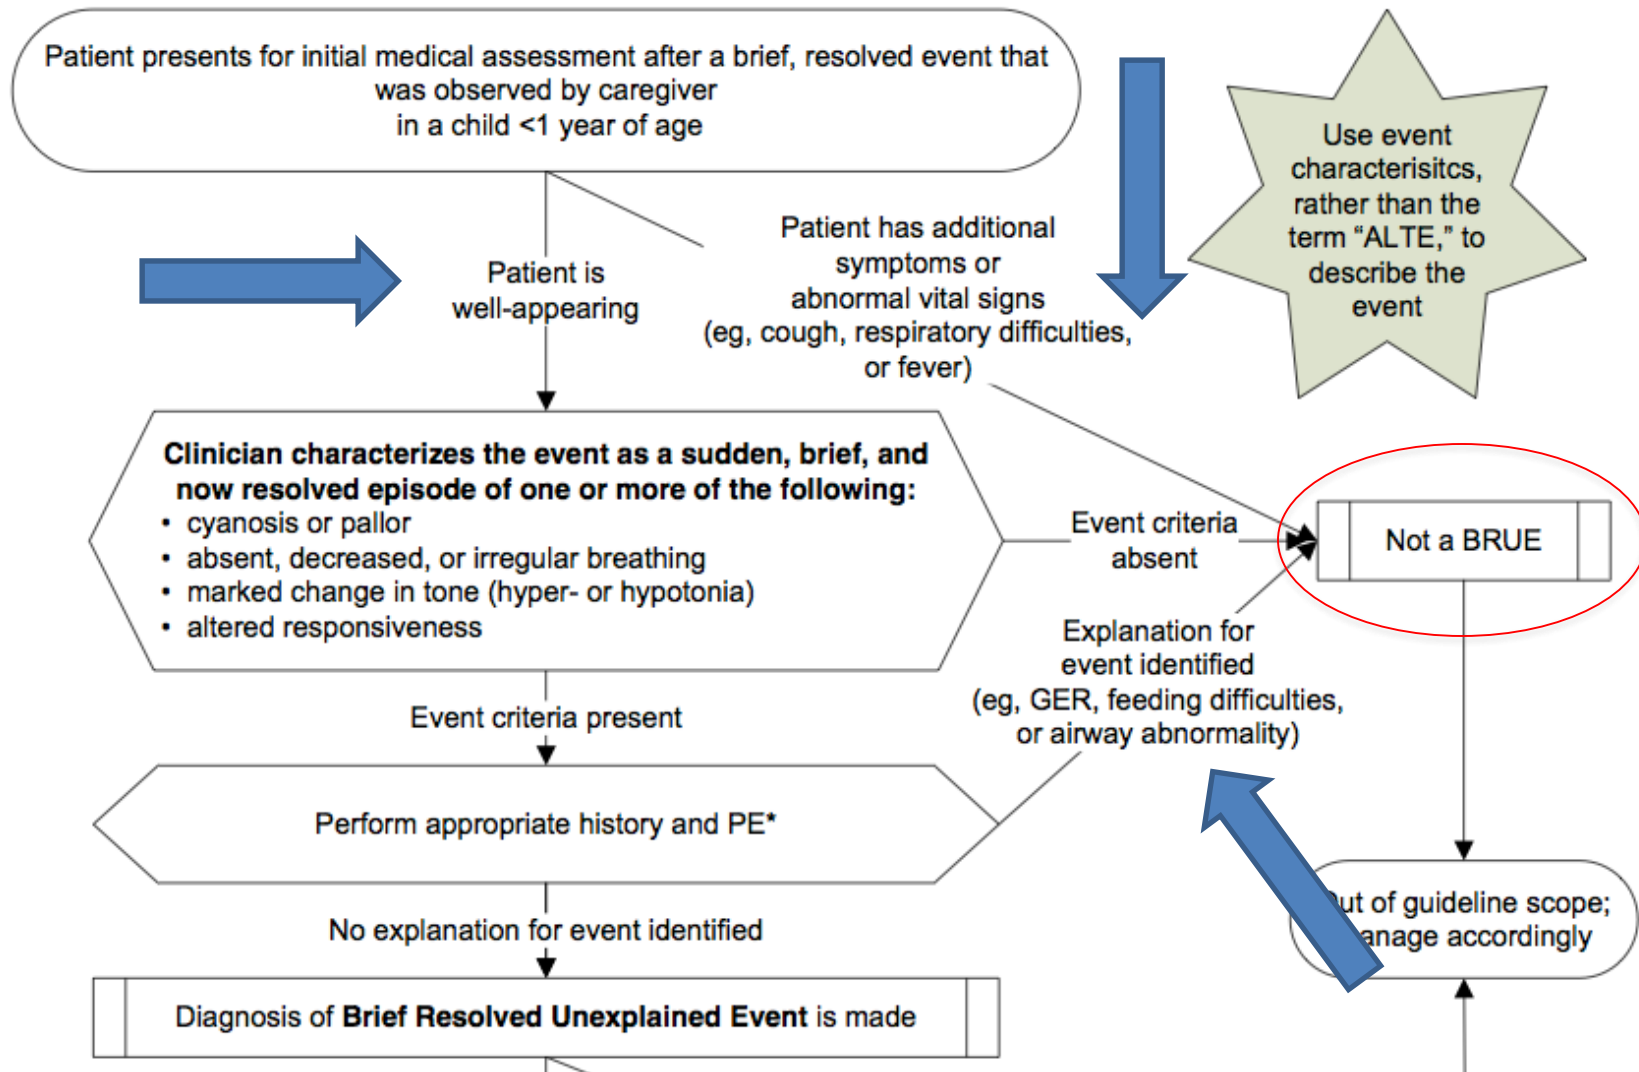

**SUPPLEMENTAL TABLE 6** Differential Diagnosis of an Infant Presenting With a Lower- or Higher-Risk BRUE**Otolaryngologic**

Maxillary hypoplasia  
Micrognathia  
Macroglossia  
Choanal atresia  
Pyramidal aperture stenosis  
Laryngomalacia/anomalies  
Subglottic stenosis  
Tracheomalacia/anomalies  
Adenotonsillar hypertrophy  
OSA  
Vaso-vagal response  
Unintentional suffocation

**Gastrointestinal**

GER  
Dysphagia/choking  
Esophageal dysmotility  
Laryngeal chemoreflex  
Bowel obstruction  
Gastroenteritis  
Tracheoesophageal fistulas  
Esophageal foreign body  
Intussusception

**Cardiovascular**

Channelopathies (prolonged QT syndromes, Brugada syndrome, short QT syndrome)  
Congenital heart disease  
Cardiomyopathy/myocarditis  
Vascular ring/sling/compression  
Ventricular pre-excitation (Wolff-Parkinson-White syndrome)  
Arrhythmia  
Sepsis  
Syncope

**Neurologic**

Seizures  
Stroke  
Intracranial mass lesion  
Brain/intracranial structural or vascular abnormality  
Intracranial hemorrhage  
Hydrocephalus  
Neuromuscular disorder  
Congenital central hypoventilation syndrome  
Apnea of prematurity  
Infant botulism  
Demyelinating disorder (transverse myelitis, multiple sclerosis, acute disseminated encephalomyelitis)

**Pulmonary**

Aspiration  
Asthma  
Foreign body  
Congenital airway anomalies/malacia  
Infection  
Hemorrhage  
Upper and lower respiratory tract infection

**Infectious**

Bronchiolitis  
Pneumonia  
Croup  
Upper respiratory infection  
UTI  
Sepsis  
Meningitis  
Gastroenteritis  
Viral syndrome  
Specific organisms (pertussis, RSV, and other respiratory viruses)

**Genetic/metabolic**

IEMs (fatty acid oxidations disorders, urea cycle disorders)  
Mitochondrial disorders  
Electrolyte disturbance  
Hypocalcemia  
Hypoglycemia

**Child maltreatment**

Abusive head trauma  
Caregiver-fabricated illness (also known as Münchausen by proxy and medical child abuse)  
Intentional suffocation  
Poisoning  
Medical neglect

**Toxin exposure**

Medication adverse effect  
Substance exposure via human milk  
Environmental exposure  
Vaccine reaction

**Miscellaneous**

Acrocyanosis  
Hypothermia  
Breath-holding spell  
Idiopathic

# Color

## ALTE

- Color change
- Apnea
- Alteration in muscle tone
- Choking or gagging

## BRUE

- Cyanosis or pallor
- Absent, decreased, or irregular breathing
- Marked change in tone (hyper- or hypotonia)
- Altered level of responsiveness

Color change-red, white, and blue

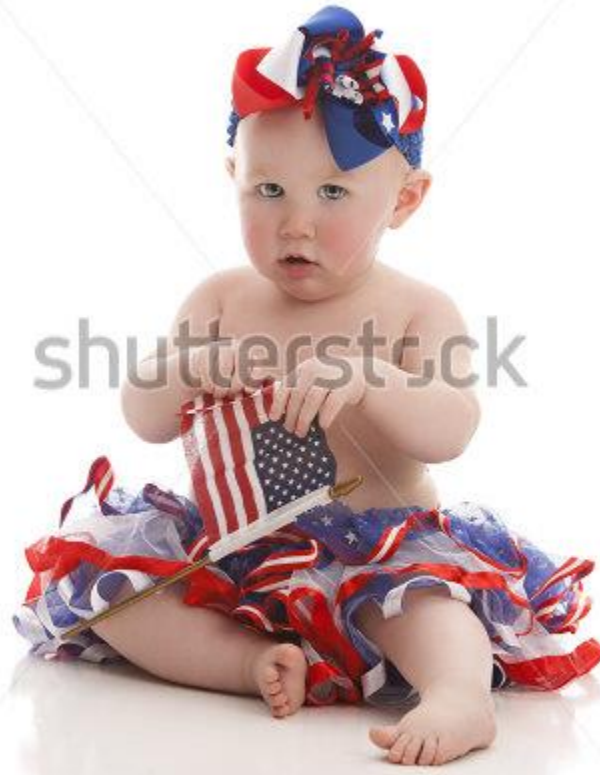



# Normal explanations of turning blue briefly

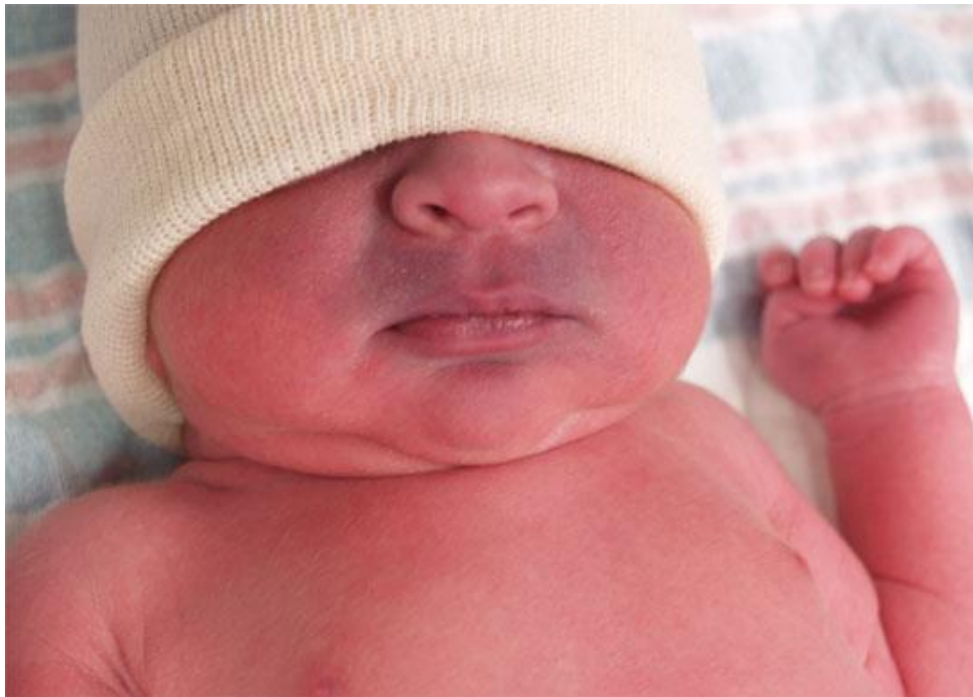

## Peripheral cyanosis

- increased O<sub>2</sub> extraction by peripheral tissue or vasoconstriction (e.g. shock)

## Acrocyanosis

- vasomotor instability

Blue episode can indicate something  
serious

## **Central cyanosis**

- bluish discoloration of oral mucous membranes

# What about red and white episodes?

- Plethora: red is a normal in infants.
- Pallor: White or ashen can be normal or a sign of decreased perfusion
- Skin color difficult to determine in different skin tones and lighting

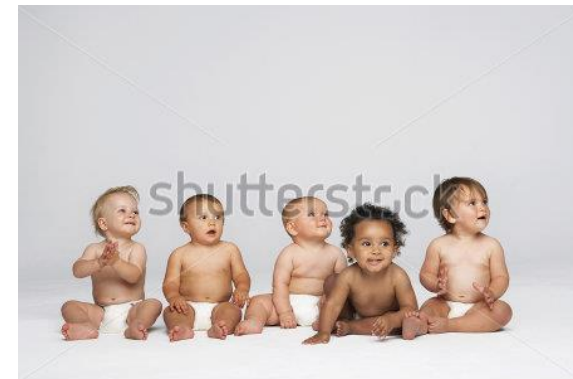

# Apnea or changes to breathing

## ALTE

- Color change
- Apnea
- Alteration in muscle tone
- Choking or gagging

## BRUE

- Cyanosis or pallor
- Absent, decreased, or irregular breathing
- Marked change in tone (hyper- or hypotonia)
- Altered level of responsiveness

# Normal explanations for episodic change in breathing

- Periodic breathing
  - Typically developing infants have periods of cyclic breathing with pauses
  - Occurs in nearly all pre-term infants and most term infants
  - Decreases dramatically after 2 months of age
  - Not a precursor for SIDS
- Irregular respirations
  - Hallmark of active sleep (REM or dream sleep)
  - Present at all ages
- Breath holding spell
- Acute decreases in oxygen saturation  $>10\%$  from baseline are observed in most infants briefly during sleep

# Concerning change in breathing

- Cessation of airflow x 20-30 sec
- Central
  - absence of respiratory effort from central respiratory center
- Obstructive
  - paradoxical inverse movements of the chest wall and abdomen with decreased saturation
- Apnea of prematurity
  - <37 weeks post-conceptual age
  - may persist in infants < 28 wk

# Muscle tone change

## ALTE

- Color change
- Apnea
- Alteration in muscle tone
- Choking or gagging

## BRUE

- Cyanosis or pallor
- Absent, decreased, or irregular breathing
- Marked change in tone (hyper- or hypotonia)
- Altered level of responsiveness

# Normal explanations for episodic changes in tone

- Stimulation (i.e., laryngospasm) from coughing, gagging, choking, crying
- Startle and fencing reflex
- LOC from Breath holding spell



# Concerning causes for episodic change in tone

## Seizure:

- Rhythmic and not extinguishable
- Eye deviation
- Limp
- Rigid
- Post-ictal
- Generalized/Altered mental status
- Infantile spasm

# Apnea or changes to breathing

## ALTE

- Color change
- Apnea
- Alteration in muscle tone
- Choking or gagging

## BRUE

- Cyanosis or pallor
- Absent, decreased, or irregular breathing
- Marked change in tone (hyper- or hypotonia)
- Altered level of responsiveness

# Normal explanation for episode of altered responsiveness

- Immature nervous system
- Somnolence
- LOC with Breath holding spell

# Concerning explanation for episode of altered responsiveness

- Seizure
- LOC
- Hypoxemia
- Hypoglycemia

## BRUE Diagnosis

Patient presents for initial medical assessment after a brief, resolved event that was observed by caregiver in a child <1 year of age

Patient is well-appearing

Patient has additional symptoms or abnormal vital signs (eg, cough, respiratory difficulties or fever)

Use event characteristics, rather than the term "ALTE," to describe the event

**Clinician characterizes the event as a sudden, brief, and now resolved episode of one or more of the following:**

- cyanosis or pallor
- absent, decreased, or irregular breathing
- marked change in tone (hyper- or hypotonia)
- altered responsiveness

Event criteria absent

Not a BRUE

Explanation for event identified (eg, GER, feeding difficulties, or airway abnormality)

Event criteria present

Perform appropriate history and PE\*

No explanation for event identified

Diagnosis of **Brief Resolved Unexplained Event** is made

Out of guideline scope; manage accordingly

# History and PE are critical to diagnose BRUE!

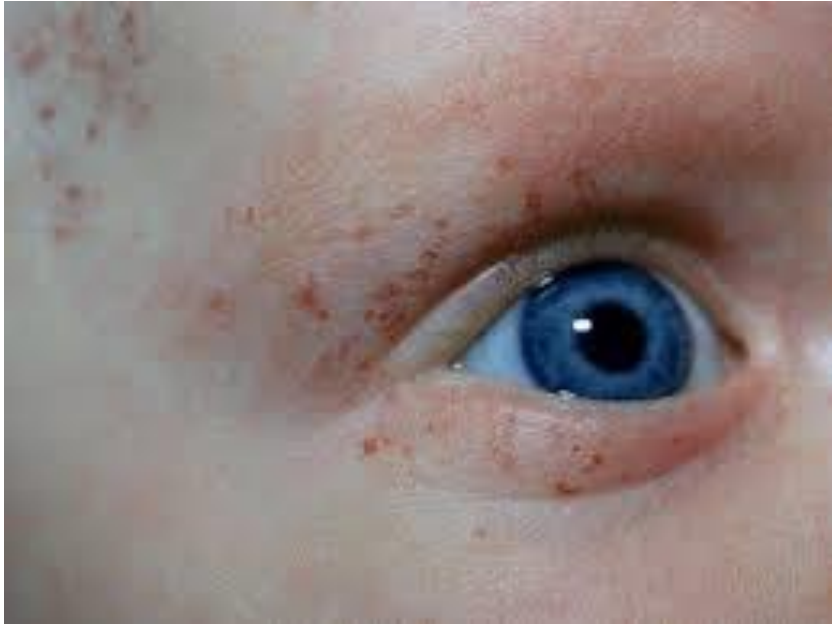

<https://www.studyblue.com/notes/note/n/review-for-test-2-family-assessment/deck/8041126>

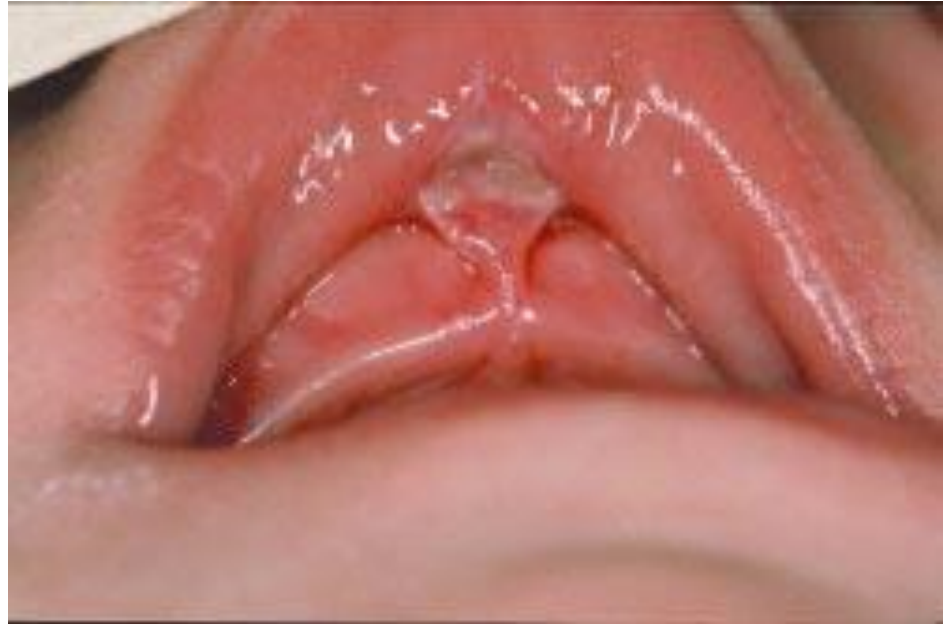

<https://www.bda.org/childprotection/Recognising/Pages/Physical.aspx>

# Risk Stratification and Recommendations for Lower-Risk

4

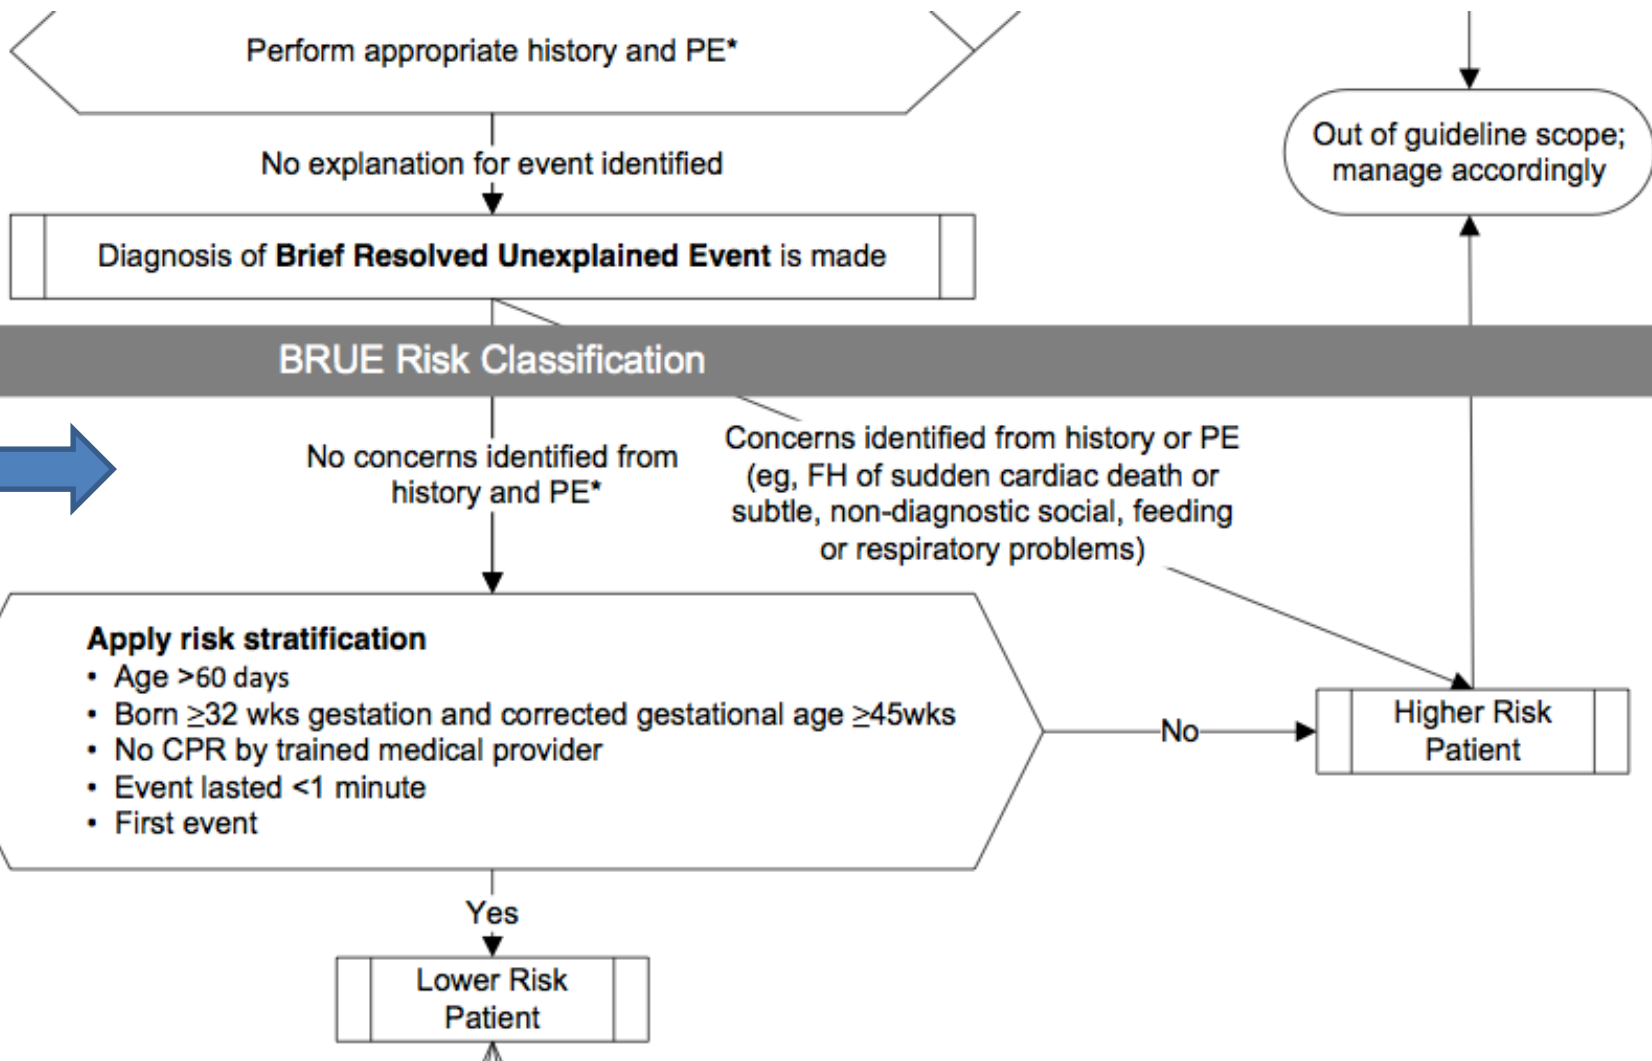



# Lower-Risk Criteria

- Age >60 days
- Prematurity: gestational age  $\geq 32$  weeks and postconceptional age  $\geq 45$  weeks
- First BRUE (no prior BRUE ever and not occurring in clusters)
- Duration of event <1 minute
- No CPR required by trained medical provider
- No concerning historical features
- No concerning physical examination findings ☐

# AAP and strength of recommendations

Lower Risk Patient

## Management Recommendations for Lower Risk Patients \*\*

### Should

- Educate caregivers about BRUEs and engage in shared decision-making to guide evaluation, disposition, and follow-up
- Offer resources for CPR training to caregiver

### Should Not

- Obtain WBC count, blood culture, or CSF analysis or culture, serum sodium, potassium, chloride, blood urea nitrogen, creatinine, calcium, ammonia, blood gases, urine organic acids, plasma amino acids or acylcarnitines, chest radiograph, echocardiogram, EEG, studies for GER
- Initiate home cardio-respiratory monitoring
- Prescribe acid suppression therapy or anti-epileptic medications

### May

- Obtain pertussis testing and 12-lead ECG
- Briefly monitor patients with continuous pulse oximetry and serial observations

### Need Not

- Obtain viral respiratory test, urinalysis, blood glucose, serum bicarbonate, serum lactic acid, laboratory evaluation for anemia, or neuroimaging
- Admit the patient to the hospital *solely* for cardiorespiratory monitoring

**Table 1. Summary of Key Action Statements for Lower-Risk BRUEs**

| When managing an infant who is >60 days and <1 year of age and who, on the basis of a thorough history and physical examination, meets criteria for having experienced a <b>lower-risk BRUE</b> , clinicians... |                                                                                                                                           | Evidence Quality;<br>Strength of<br>Recommendation |
|-----------------------------------------------------------------------------------------------------------------------------------------------------------------------------------------------------------------|-------------------------------------------------------------------------------------------------------------------------------------------|----------------------------------------------------|
| <b>1. Cardiopulmonary Evaluation</b>                                                                                                                                                                            |                                                                                                                                           |                                                    |
| 1A                                                                                                                                                                                                              | Need not admit infants to the hospital <i>solely</i> for cardiorespiratory monitoring.                                                    | B; Weak                                            |
| 1B                                                                                                                                                                                                              | May briefly monitor patients with continuous pulse oximetry and serial observations.                                                      | D; Weak                                            |
| 1C                                                                                                                                                                                                              | Should not obtain chest radiography.                                                                                                      | B; Moderate                                        |
| 1D                                                                                                                                                                                                              | Should not obtain a measurement of venous or arterial blood gas.                                                                          | B; Moderate                                        |
| 1E                                                                                                                                                                                                              | Should not obtain overnight polysomnography.                                                                                              | B; Moderate                                        |
| 1F                                                                                                                                                                                                              | May obtain a 12-lead electrocardiography.                                                                                                 | C; Weak                                            |
| 1G                                                                                                                                                                                                              | Should not obtain an echocardiography.                                                                                                    | C; Moderate                                        |
| 1H                                                                                                                                                                                                              | Should not initiate home cardiorespiratory monitoring.                                                                                    | B; Moderate                                        |
| <b>2. Child Abuse Evaluation</b>                                                                                                                                                                                |                                                                                                                                           |                                                    |
| 2A                                                                                                                                                                                                              | Need not obtain neuroimaging (CT, MRI, or ultrasonography) to detect child abuse.                                                         | C; Weak                                            |
| 2B                                                                                                                                                                                                              | Should obtain an assessment of social risk factors to detect child abuse.                                                                 | C; Moderate                                        |
| <b>3. Neurologic Evaluation</b>                                                                                                                                                                                 |                                                                                                                                           |                                                    |
| 3A                                                                                                                                                                                                              | Should not obtain neuroimaging (CT, MRI, or ultrasonography) to detect neurologic disorders                                               | C; Moderate                                        |
| 3B                                                                                                                                                                                                              | Should not obtain electroencephalogram to detect neurologic disorders.                                                                    | C; Moderate                                        |
| 3C                                                                                                                                                                                                              | Should not prescribe antiepileptic medications.                                                                                           | C; Moderate                                        |
| <b>4. Infectious Disease Evaluation</b>                                                                                                                                                                         |                                                                                                                                           |                                                    |
| 4A                                                                                                                                                                                                              | Should not obtain a white blood cell (WBC) count, blood culture, or cerebrospinal fluid analysis or culture to detect an occult bacterial | B; Strong                                          |

# Pulmonology

- **Need not** admit the patient to the hospital *solely* for cardiorespiratory monitoring (B, Weak)
- **May** briefly monitor patients with continuous pulse oximetry and serial observations (D, Weak)
- **Should not** obtain a chest radiograph (B, Mod)
- **Should not** obtain measurement of blood gases (B, Mod)
- **Should not** initiate home cardio-respiratory monitoring (B, Mod)
- **Should not** obtain overnight polysomnography (B, Mod)

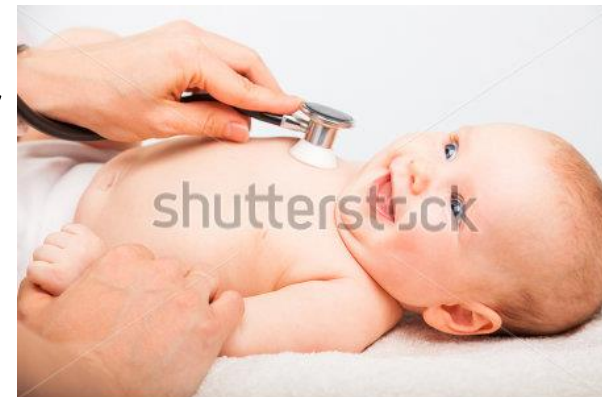

# Cardiology

- **May** obtain a 12-lead electrocardiogram. (C, Weak)
- **Should not** obtain echocardiography (C, Moderate)

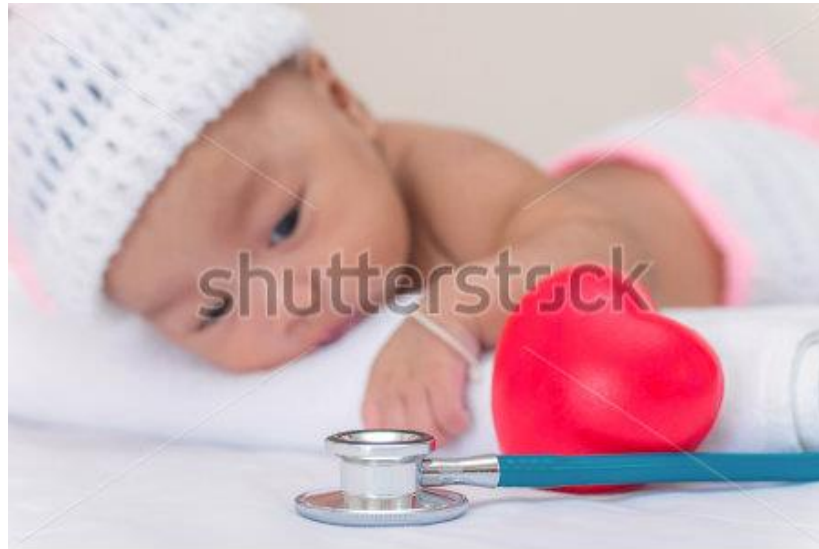

# Child abuse

- **Need not** obtain neuroimaging (CT, MRI, US) to detect child abuse (C, Weak)
- **Should** obtain an assessment of social risk factors to detect child abuse (C, Weak)

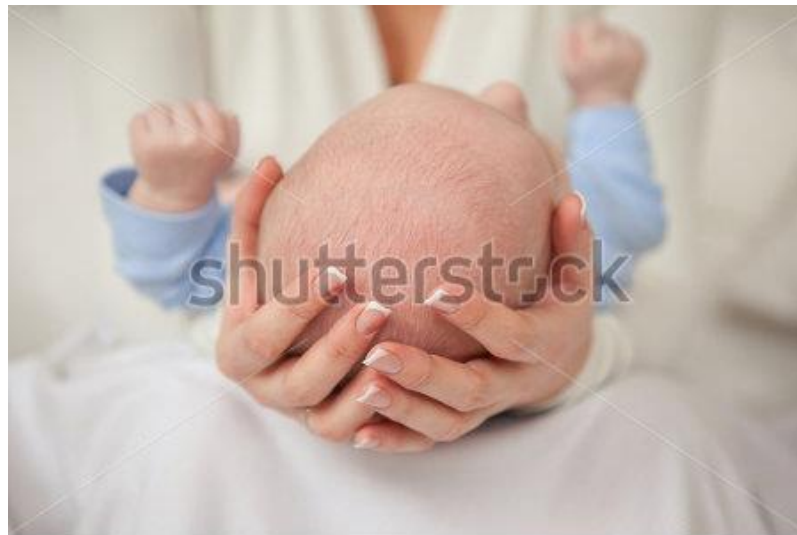

# Neurology

- **Should not** obtain neuroimaging (CT, MRI, US) to detect neurologic disorders (C, Mod)
- **Should not** obtain an EEG (electroencephalography) (C, Mod)
- **Should not** prescribe anti-epileptic medications

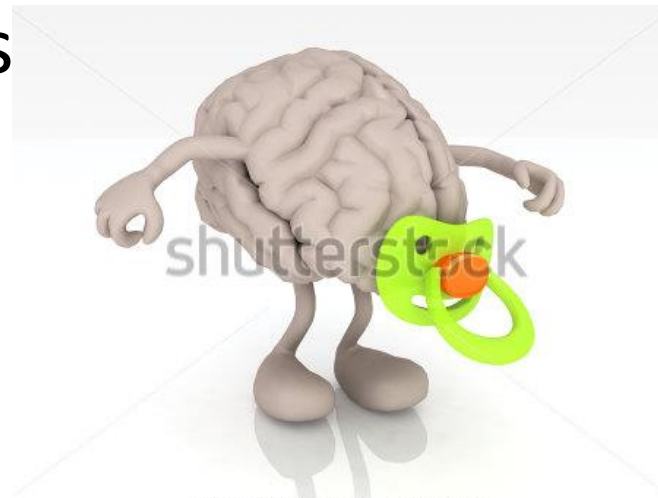

# Infectious Disease

- **Should not** obtain a WBC, blood culture, or CSF analysis or culture to identify an occult bacterial infection (B, Strong)
- **Should not** obtain a chest radiograph to assess for pulmonary infection (B, Mod)
- **Need not** obtain a UA (C, Weak)
- **Need not** obtain respiratory viral testing in infants (C, Weak)
- **May** obtain test for pertussis (B, Weak)

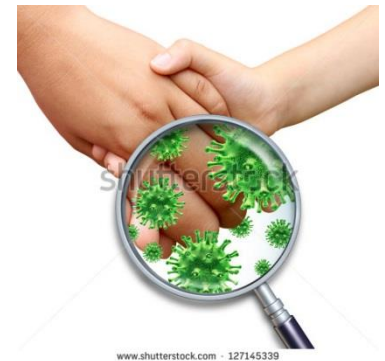



# Gastroenterology

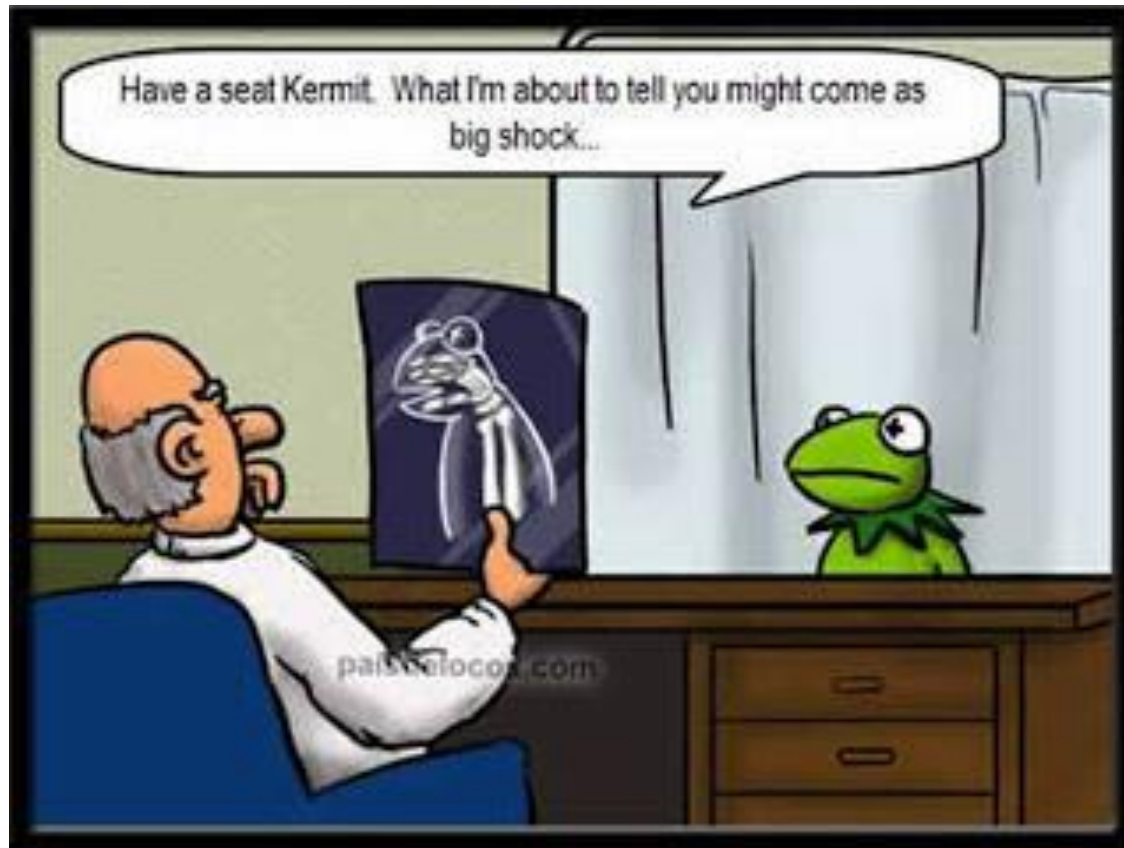

# Gastroenterology

- **Should not** obtain investigations for GER (C, Mod)
- **Should not** prescribe acid suppression therapy (C, Mod)

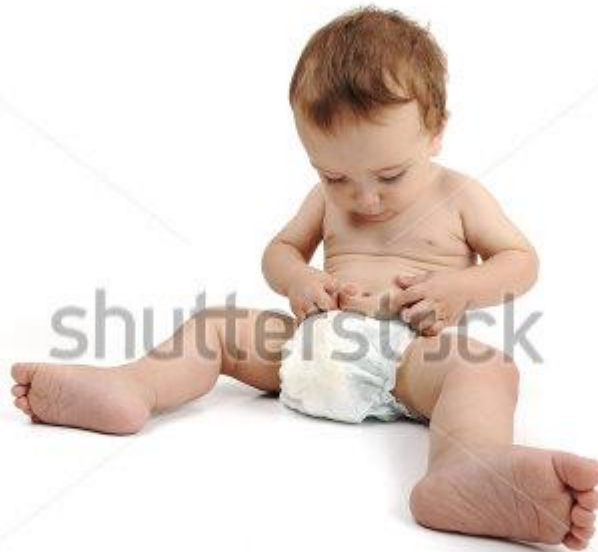

# Inborn Error of Metabolism

- **Need not** obtain blood glucose (C, Weak)
- **Need not** obtain serum lactic acid or bicarbonate (C, Weak)
- **Should not** obtain serum sodium, potassium, chloride, BUN, creatinine, calcium, or ammonia (C, Mod)
- **Should not** obtain venous or arterial blood gas (C, Mod)
- **Should not** obtain urine organic acids, plasma amino acids or plasma acylcarnitines (C, Mod)

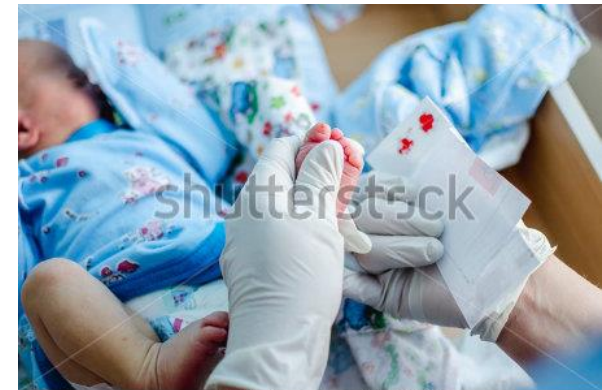

www.shutterstock.com · 411760837

# Anemia

- **Should not** obtain laboratory evaluations for anemia (C. Mod)

# Patient- and Family-Centered Care

- **Should** offer resources for CPR training to caregiver (C, Mod)
- **Should** educate caregivers about BRUEs (D, Weak)
- **Should** use shared decision making (C. Mod)

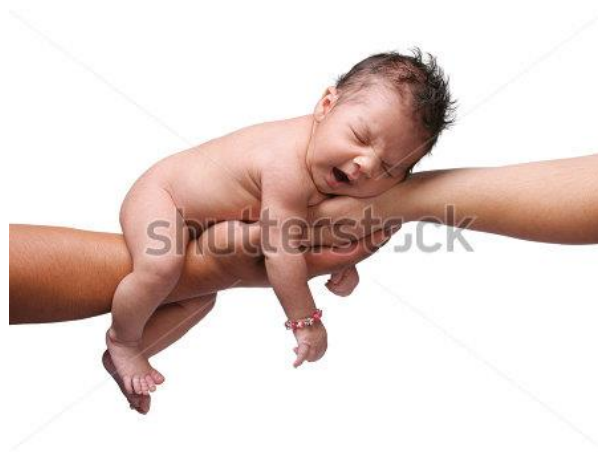

# Implementation and Improvement

5

# Implementation & Improvement: AAP.org

- Education
  - AAP, AAFP, ACEP, ABP, SHM news and conference outlets
  - Caregiver handout
  - Webinar
- Work flow integration
  - Crowdsourcing of orderset, H&P templates, algorithm
- QI, research, billing
  - ICD-9/10 codes, MOC collaborative with QuIIN/VIP/PEMCRC
  - Proposed quality measures
  - Key Driver Diagram

The screenshot displays the AAP.org website interface. At the top, the American Academy of Pediatrics logo is visible, along with the tagline "DEDICATED TO THE HEALTH OF ALL CHILDREN™". Navigation links include "Professional Resources", "Professional Education", "Advocacy & Policy", "shopAAP", and "About the AAP". A search bar is located in the top right corner. The main content area is titled "Council on Quality Improvement and Patient Safety" and features a sub-section for "Quality Improvement Implementation Tools and Resources". Below this, there is a list of resources categorized into "Patient Care Online (PCO) Webinars", "Draft Quality Improvement Tools", and "Patient-Education Resources". The "Patient Care Online (PCO) Webinars" section includes a link for "BRUE Guideline PCO Webinar". The "Draft Quality Improvement Tools" section includes links for "BRUE Guideline Quality Metrics" and "BRUE Key Driver Diagram". The "Patient-Education Resources" section includes links for "Brief Resolved Unexplained Event: What Parents and Caregivers Need to Know (English)" and "Brief Resolved Unexplained Event: What Parents and Caregivers Need to Know (Spanish)". A "Clinical Practice Guideline" section is also present, titled "The Classification of Brief Resolved Unexplained Events (BRUEs), Formerly Called Apparent Life-Threatening Events, and the Evaluation and Management of Lower-Risk BRUEs". At the bottom of the page, a footer note states: "COQIPS and the Implementation Committee are always looking for new and improved resources to place on this website. If you have a useful resource, or if you see a topic that is not covered on this website, please contact implementation@listserv.aap.org. All resources will be placed with attribution to the person or group that submitted them."

# Key Driver Diagram: AAP.org

## Brief Resolved Unexplained Event Key Driver Diagram

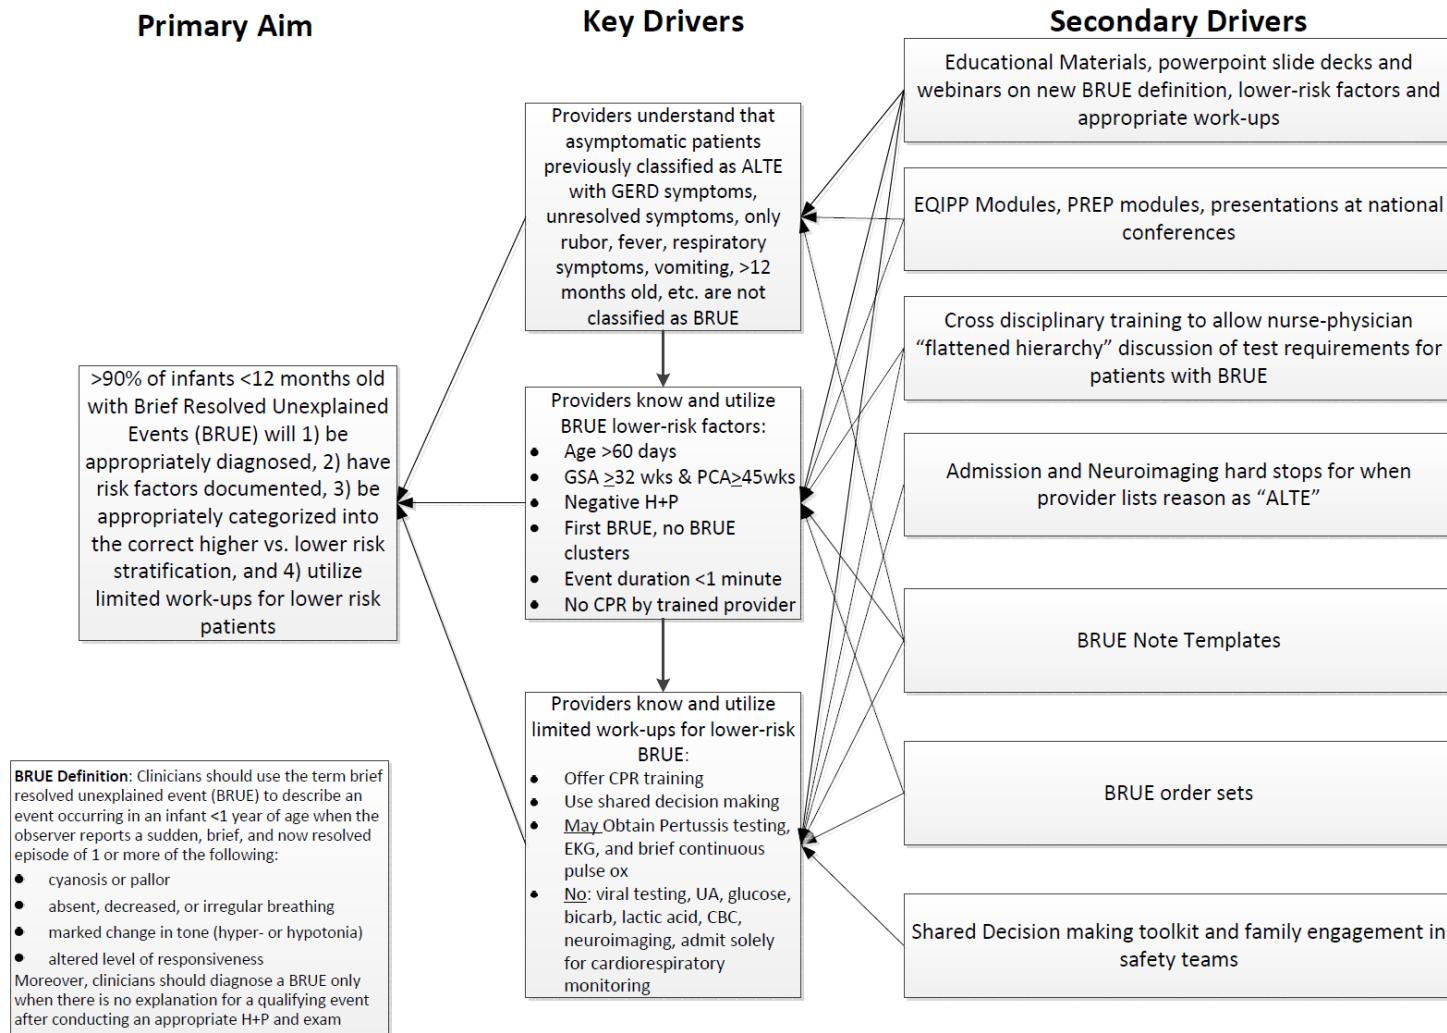



# Caregiver Handouts: AAP.org

## Evento breve inexplicable resuelto: lo que los padres y cuidadores deben saber

(Brief Resolved Unexplained Event)

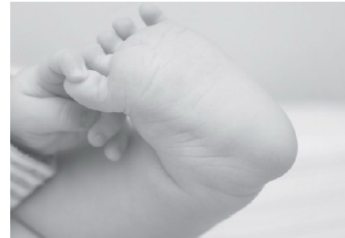

### ¿Qué es un evento breve inexplicable resuelto?

Un evento breve inexplicable resuelto (brief resolved unexplained event, BRUE por sus siglas en Inglés) se produce repentinamente y puede ser aterrador para los padres y cuidadores. Un evento breve inexplicable resuelto es un diagnóstico realizado después de que el pediatra o el profesional de

P: ¿Al tener un evento breve inexplicable resuelto, aumenta el riesgo de que mi bebé sufra el síndrome de muerte súbita del lactante (*sudden infant death syndrome, SIDS*)?

R: No, si bien no se conocen las causas del SIDS, los eventos como estos no aumentan el riesgo de tal síndrome. Para todos los bebés, es importante crear un

## Brief Resolved Unexplained Event: What Parents and Caregivers Need to Know

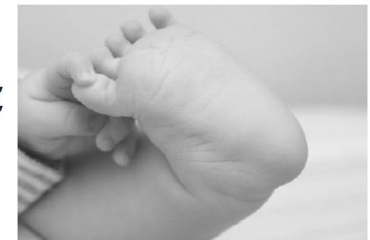

### What is a brief resolved unexplained event?

A brief resolved unexplained event (or BRUE for short) occurs suddenly and can be scary for parents and caregivers. A brief resolved unexplained event is a diagnosis made after your baby's doctor or health care professional has

environments. Visit [www.HealthyChildren.org/safesleep](http://www.HealthyChildren.org/safesleep) to learn more about how to create a safe sleeping environment for your baby.

Q: What should I do if it happens again?

# Future Directions

- Guidance on Higher-Risk BRUEs
- Better identification of child abuse
- Understand epidemiology and risk
- Understand patient- and family-centered outcomes
- Empiric GER treatment

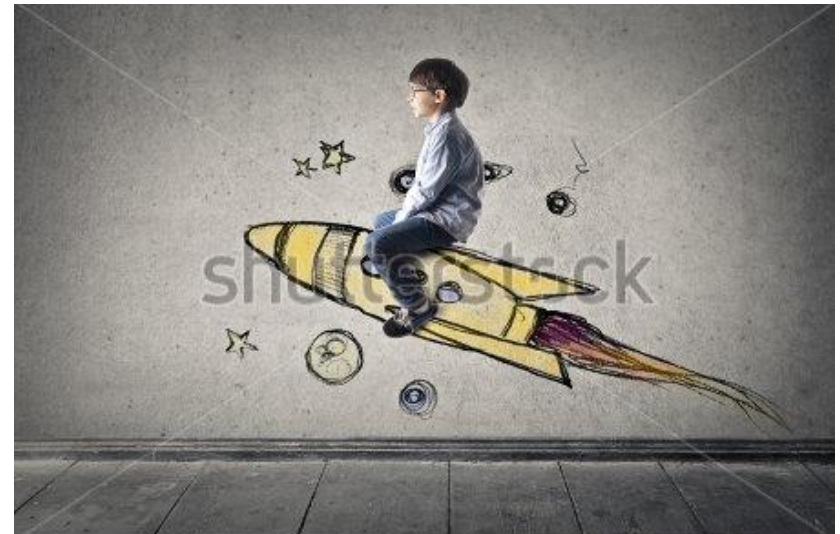

# Take home points

- ALTEs are very different from SIDS
- Can you explain the event with careful history and physical exam?
- Remember child abuse can present as an ALTE/BRUE
- Is the patient asymptomatic and well-appearing?
- Is the patient in the lower-risk group?
- Perform diagnostic tests based on true, rather than perceived risk
- Use shared decision making and inform caregivers of potential harm to testing/hospitalization
- Goodbye ALTE...Hello BRUE

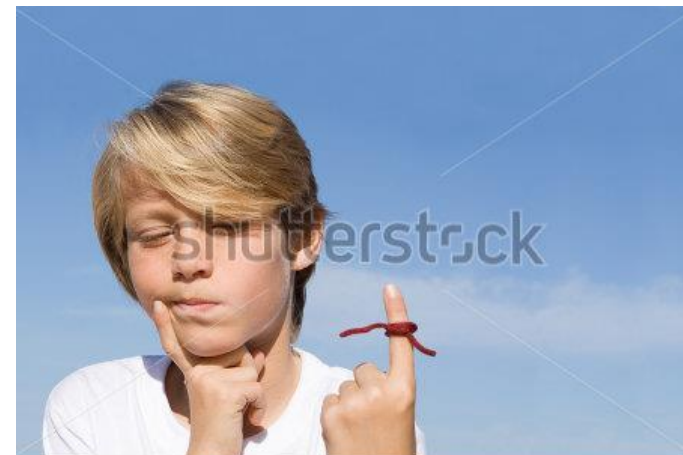

# A special thanks to...

## AAP Sub-Committee

Josh Bonkowsky

Ruth Etzel

Wayne Franklin

David Gremse

Bruce Herman

Eliot Katz

Leonard Krilov

Lawrence Merrit

Chuck Norlin

Jack Percelay

Robert Sapien

Rick Shiffman

Mike Smith

## AAP Support

Ricardo Quinonez

Diana Cunningham

Caryn Davidson

Lisa Krams

Kymika Okechukwu

...and 40+ guideline  
reviewers

## SHM ALTE expert panel

Rob in Altman

Josh Bonkowsky

Don Brand

Ilene Claudius

Diana Cunningham

Jack Percelay

Raymond Pitteti

Mike Smith

Taylor Marsh

# Questions and Discussion

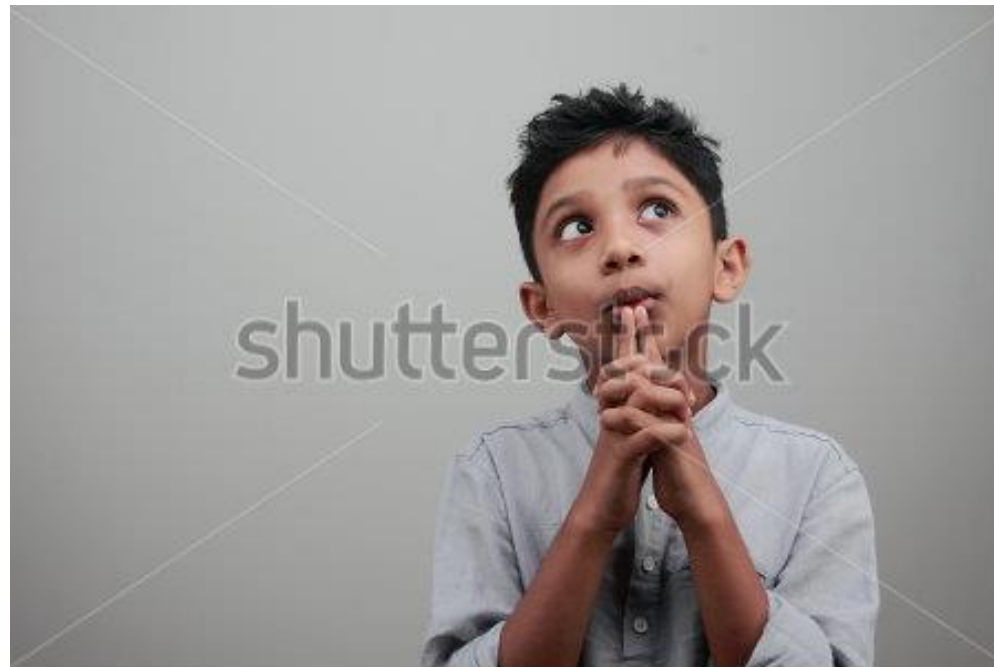

[www.shutterstock.com](http://www.shutterstock.com) · 334658660

# References (in order of appearance)

1. National Institutes of Health (1987) Consensus development conference on infantile apnea and home monitoring 1986. *Pediatrics* 79: 292-299
2. Monti MC, Borrelli P, Nosetti L, Tajè S, Perotti M, Bonarrigo D, Stramba Badiale M, Montomoli C. Incidence of apparent life-threatening events and post-neonatal risk factors. *Acta Paediatr.* 2016 Mar 6.
3. Kiechl-Kohlendorfer U, Hof D, Peglow UP, Traweger-Ravanelli B, Kiechl S. Epidemiology of apparent life threatening events. *Arch Dis Child.* 2005 Mar;90(3):297-300.
4. Ramanathan R, Corwin MJ, Hunt CE, et al. Cardiorespiratory events recorded on home monitors: comparison of healthy infants with those at increased risk for SIDS. *JAMA* 2001;285: 2199– 207
5. Mitchell EA, Thompson JM. Parental reported apnoea, admissions to hospital and sudden infant death syndrome. *Acta Paediatr* 2001;90:417– 22.]
6. McGovern MC, Smith MB. Causes of apparent life threatening events in infants: a systematic review. *Arch Dis Child.* 2004 Nov;89(11):1043-8. Review.
7. Bonkowsky, J. L., Guenther, E., Filloux, F. M., & Srivastava, R. (2008). Death, child abuse, and adverse neurological outcome of infants after an apparent life- threatening event. *Pediatrics*, 122(1), 125-131. doi: 10.1542/peds.2007-3376
8. Esani N, Hodgman JE, Ehsani N, Hoppenbrouwers T. Apparent life-threatening events and sudden infant death syndrome: comparison of risk factors. *J Pediatr.* 2008 Mar;152(3):365-70.
9. Freed GE, Steinschneider A, Glassman M, Winn K. Sudden infant death syndrome prevention and an understanding of selected clinical issues. *Pediatr Clin North Am.* 1994 Oct;41(5):967-90. Review
10. Tieder JS et al. Variation in inpatient resource utilization and management of Apparent Life-Threatening Events. *J Peds.* 2008 May;152(5):629-35, 635.
11. Tieder JS, Altman RL, Bonkowsky JL, Brand DA, Claudius I, Cunningham DJ, DeWolfe C, Percelay JM, Pitetti RD, Smith MB. Management of apparent life-threatening events in infants: a systematic review. *J Pediatr.* 2013 Jul;163(1):94-9.e1-6.
12. Tieder JS, et al. Brief Resolved Unexplained Events (Formerly Apparent Life-Threatening Events) and Evaluation of Lower-Risk Infants: Executive Summary
