# Supplementary material for: Brief Resolved Unexplained Events (Formerly Apparent Life-Threatening Events) and Evaluation of Lower-Risk Infants
Source: Oxford University Press journal article supplement (doi:10.1542/peds.2016-0590), 2016-04-25

# Brief Resolved Unexplained Event Key Driver Diagram

## Primary Aim

>90% of infants <12 months old with Brief Resolved Unexplained Events (BRUE) will 1) be appropriately diagnosed, 2) have risk factors documented, 3) be appropriately categorized into the correct higher vs. lower risk stratification, and 4) utilize limited work-ups for lower risk patients

**BRUE Definition:** Clinicians should use the term brief resolved unexplained event (BRUE) to describe an event occurring in an infant <1 year of age when the observer reports a sudden, brief, and now resolved episode of 1 or more of the following:

- cyanosis or pallor
- absent, decreased, or irregular breathing
- marked change in tone (hyper- or hypotonia)
- altered level of responsiveness

Moreover, clinicians should diagnose a BRUE only when there is no explanation for a qualifying event after conducting an appropriate H+P and exam

## Key Drivers

Providers understand that asymptomatic patients previously classified as ALTE with GERD symptoms, unresolved symptoms, only rubor, fever, respiratory symptoms, vomiting, >12 months old, etc. are not classified as BRUE

Providers know and utilize BRUE lower-risk factors:

- Age >60 days
- GSA  $\geq$ 32 wks & PCA  $\geq$ 45wks
- Negative H+P
- First BRUE, no BRUE clusters
- Event duration <1 minute
- No CPR by trained provider

Providers know and utilize limited work-ups for lower-risk BRUE:

- Offer CPR training
- Use shared decision making
- May Obtain Pertussis testing, EKG, and brief continuous pulse ox
- No: viral testing, UA, glucose, bicarb, lactic acid, CBC, neuroimaging, admit solely for cardiorespiratory monitoring

## Secondary Drivers

Educational Materials, powerpoint slide decks and webinars on new BRUE definition, lower-risk factors and appropriate work-ups

EQIPP Modules, PREP modules, presentations at national conferences

Cross disciplinary training to allow nurse-physician “flattened hierarchy” discussion of test requirements for patients with BRUE

Admission and Neuroimaging hard stops for when provider lists reason as “ALTE”

BRUE Note Templates

BRUE order sets

Shared Decision making toolkit and family engagement in safety teams

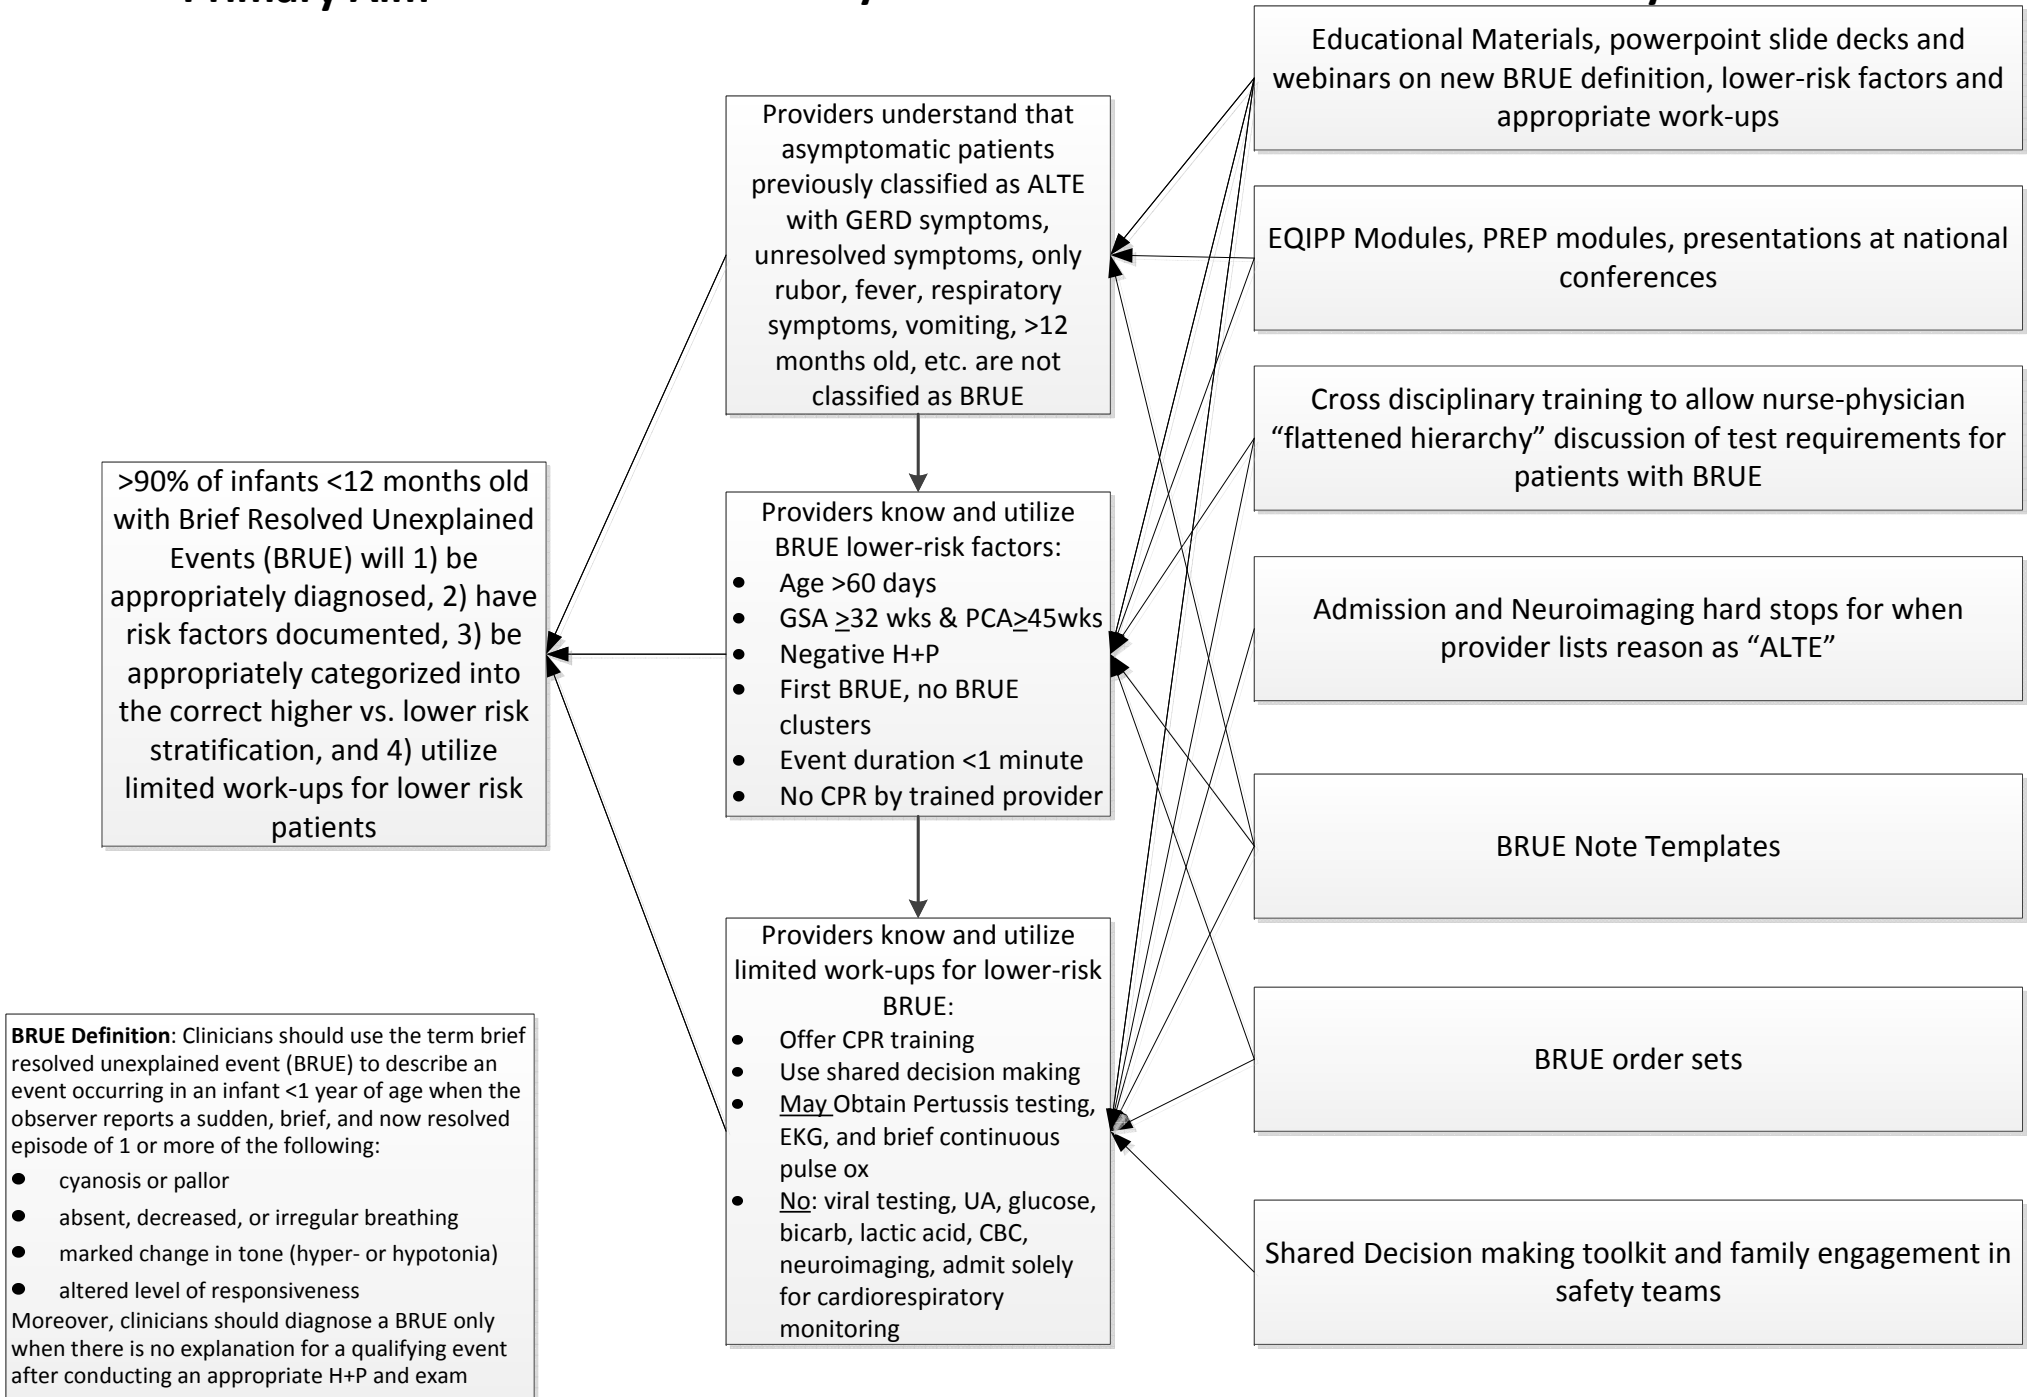

Supplement: peds20160590-sup-quality_brue_key_driver_diagram.pdf [file peds20160590-sup-quality_brue_key_driver_diagram.pdf]
