# Supplementary material for: Brief Resolved Unexplained Events (Formerly Apparent Life-Threatening Events) and Evaluation of Lower-Risk Infants
Source: Oxford University Press journal article supplement (doi:10.1542/peds.2016-0590), 2016-04-25
Supplement: peds20160590-sup-quality_brue_metrics.pdf [file peds20160590-sup-quality_brue_metrics.pdf]

## Proposed Quality Measures for Brief Resolved Unexplained Events

Settings: Emergency departments, outpatient clinics and private offices

Inclusion Criteria: Patient < 1 year of age presenting for medical care after an event consistent with either an ALTE or BRUE

Exclusion Criteria: Patients who required intubation

### 1) Definition

Proportion of patients with ALTE appropriately classified as BRUE

Numerator: Number of patients with ALTE correctly classified as BRUE or non-BRUE

Denominator: Number of patients with ALTE

Data Source: chart review

Goal: 90 or 95%

### 2) Risk stratification

Proportion of patients with BRUE categorized into the correct risk stratification

Numerator: Number of BRUES correctly classified as lower risk or high risk

Denominator: Number of patients with BRUE

Data Source: chart review

Goal: 95%

### 3) Risk factor documentation

Proportion of patients with BRUE with documentation of risk factors

Numerator: Number of patients with a BRUE and documentation of all RFs on check list

Denominator: Number of patients with BRUE

Data Source: Chart Review

Goal: 90%

Suggested core set of RF

Prior history - Gestational age, previously healthy, no prior episodes;

Family history - sudden death;

Social History – concern for NAT;

Event history - event duration, CPR, GER symptoms;

Physical exam -Well appearing, vital signs, HEENT/cardiac/lung/neurologic exams normal or baseline

### 4) Resource Utilization

Proportion of patients with lower risk BRUE without excess resource utilization

Numerator: Number of infants with lower risk BRUE who were 1) discharged home (not admitted for observation or inpatient admission) and 2) received no imaging, procedures or laboratory other than EKG, brief pulse ox monitoring or pertussis testing. Examples of excess resource utilization include lab tests: CBC, BMP, blood gas, viral testing, urinalysis, cultures; imaging tests: CXR, UGI, video swallow study; procedure: polysomnography, PH probe, Multiple intraluminal impedance testing

Denominator: Number of patients with lower risk BRUE

Data Source: Chart review or Administrative data

### 5) Revisits

Proportion of patients with lower risk BRUE with revisit to healthcare provider within 7 days

Numerator: Number of infants with lower risk BRUE who have an unscheduled revisit within 7 days for symptoms or concerns related to ALTE

Denominator: Number of patients with lower risk BRUE

Data Source: Chart review (administrative data could be used but relies on ICD-10 code to determine if the revisit was related to an ALTE)

6) [Other possible metrics for research initiatives](#)

1. Length of visit
2. Costs
3. Ultimate diagnosis
4. Family experience
